## Site-specific effects of neurosteroids on GABA<sub>A</sub> receptor activation and desensitization

**Yusuke Sugasawa<sup>1</sup>, Wayland W. L. Cheng<sup>1</sup>, John R. Bracamontes<sup>1</sup>, Zi-Wei Chen<sup>1,5</sup>, Lei Wang<sup>1</sup>,  
Allison L. Germann<sup>1</sup>, Spencer R. Pierce<sup>1</sup>, Thomas C. Senneff<sup>1</sup>, Kathiresan Krishnan<sup>2</sup>,  
David E. Reichert<sup>3,5</sup>, Douglas F. Covey<sup>1,2,4,5</sup>, Gustav Akk<sup>1,5</sup>, Alex S. Evers<sup>1,2,5\*</sup>**

From the Departments of <sup>1</sup>Anesthesiology, <sup>2</sup>Developmental Biology, <sup>3</sup>Radiology, <sup>4</sup>Psychiatry, and the  
<sup>5</sup>Taylor Family Institute for Innovative Psychiatric Research, Washington University in St. Louis, St.  
Louis, Missouri 63110.

\*To whom correspondence should be addressed: Professor Alex S. Evers, Department of Anesthesiology,  
Washington University School of Medicine, Campus Box 8054, St. Louis, Missouri 63110. Telephone:  
(314) 454-8701; Fax: (314) 454-5572; E-mail: [eversa@wustl.edu](mailto:eversa@wustl.edu)

|                     |                                                                      |
|---------------------|----------------------------------------------------------------------|
| Yusuke Sugasawa     | <a href="mailto:sugasaway@wustl.edu">sugasaway@wustl.edu</a>         |
| Wayland W. L. Cheng | <a href="mailto:wayland.cheng@wustl.edu">wayland.cheng@wustl.edu</a> |
| John R. Bracamontes | <a href="mailto:jbracamontes@wustl.edu">jbracamontes@wustl.edu</a>   |
| Zi-Wei Chen         | <a href="mailto:chenziwei@wustl.edu">chenziwei@wustl.edu</a>         |
| Lei Wang            | <a href="mailto:leiwang@wustl.edu">leiwang@wustl.edu</a>             |
| Allison L. Germann  | <a href="mailto:germanna@wustl.edu">germanna@wustl.edu</a>           |
| Spencer R. Pierce   | <a href="mailto:spencerp@wustl.edu">spencerp@wustl.edu</a>           |
| Thomas C. Senneff   | <a href="mailto:tcsenneff@wustl.edu">tcsenneff@wustl.edu</a>         |
| Kathiresan Krishnan | <a href="mailto:krishnan@wustl.edu">krishnan@wustl.edu</a>           |
| David E. Reichert   | <a href="mailto:reichertd@wustl.edu">reichertd@wustl.edu</a>         |
| Douglas F. Covey    | <a href="mailto:dcovey@wustl.edu">dcovey@wustl.edu</a>               |
| Gustav Akk          | <a href="mailto:akk@wustl.edu">akk@wustl.edu</a>                     |

1 **ABSTRACT**

2 This study examines how site-specific binding to the three identified neurosteroid binding sites in the  
3  $\alpha_1\beta_3$  GABA<sub>A</sub> receptor (GABA<sub>A</sub>R) contributes to neurosteroid allosteric modulation. We found that the  
4 potentiating neurosteroid, allopregnanolone, but not its inhibitory 3 $\beta$ -epimer epi-allopregnanolone, binds  
5 to the canonical  $\beta_3(+)-\alpha_1(-)$  intersubunit site that mediates receptor activation by neurosteroids. In contrast,  
6 both allopregnanolone and epi-allopregnanolone bind to intrasubunit sites in the  $\beta_3$  subunit, promoting  
7 receptor desensitization and the  $\alpha_1$  subunit promoting ligand-specific effects. Two neurosteroid analogues  
8 with diazirine moieties replacing the 3-hydroxyl (KK148 and KK150) bind to all three sites, but do not  
9 potentiate GABA<sub>A</sub>R currents. KK148 is a desensitizing agent, whereas KK150 is devoid of allosteric  
10 activity. These compounds provide potential chemical scaffolds for site-specific and general neurosteroid  
11 antagonists. Collectively, these data show that differential occupancy and efficacy at three discrete  
12 neurosteroid binding sites determine whether a neurosteroid has potentiating, inhibitory, or competitive  
13 antagonist activity on GABA<sub>A</sub>Rs.

14

15

16

17 **Keywords:** neurosteroids; GABA<sub>A</sub> receptor; desensitization; radioligand binding; photoaffinity labeling;

18 site-directed mutagenesis

19

20

## 1 INTRODUCTION

2 Neurosteroids (NS) are endogenous modulators of brain development and function and are important  
3 mediators of mood (1-4). Exogenously administered NS analogues have been clinically used as anesthetics  
4 and anti-depressants and have therapeutic potential as anti-epileptics, neuroprotective agents and cognitive  
5 enhancers (1,2,5-9). The principal target of NS is the  $\gamma$ -aminobutyric acid type A receptor (GABA<sub>A</sub>R). NS  
6 can either activate or inhibit GABA<sub>A</sub>Rs. Positive allosteric modulatory NS (PAM-NS) such as  
7 allopregnanolone (3 $\alpha$ 5 $\alpha$ P) potentiate the effect of GABA on GABA<sub>A</sub>R currents at low concentrations and  
8 directly activate the receptors at higher concentrations (5,10-12). Negative allosteric modulatory NS  
9 (NAM-NS), such as epi-allopregnanolone (3 $\beta$ 5 $\alpha$ P) or pregnenolone sulfate (PS) inhibit GABA<sub>A</sub>R currents  
10 (13-17). In addition to enhancing channel opening, PAM-NS increase the affinity of the GABA<sub>A</sub>R for  
11 orthosteric ligand binding, an effect thought to be mechanistically linked to channel gating (11,18).

12  
13 GABA<sub>A</sub>Rs are pentameric ligand-gated ion channels (pLGIC) composed of two  $\alpha$ -subunits ( $\alpha_{1-6}$ ), two  
14  $\beta$ -subunits ( $\beta_{1-3}$ ) and one additional subunit ( $\gamma_{1-3}$ ,  $\delta$ ,  $\epsilon$ ,  $\theta$  or  $\pi$ ) (19-21). Each subunit is composed of a large  
15 extracellular domain (ECD), a transmembrane domain (TMD) formed by four membrane-spanning helices  
16 (TM1-4), a long intracellular loop between TM3 and TM4, and a short extracellular C-terminus (5,19,20,22).  
17 NS modulate GABA<sub>A</sub>Rs by binding to sites within the TMDs (1,2,5,6,11,23-28). Specifically, the  $\alpha$  subunit  
18 TMDs are essential to the actions of PAM-NS (11,23,24,27,28). Mutagenesis studies in  $\alpha_1\beta_2\gamma_2$  GABA<sub>A</sub>Rs  
19 have identified several residues in the  $\alpha_1$  subunit, notably Q242 and W246 in TM1, as critical to NS  
20 potentiation of GABA-elicited currents (25,26,29). Crystallographic studies have subsequently shown that,  
21 in homo-pentameric chimeric receptors in which the TMDs are derived from either  $\alpha_1$  (24,27) or  $\alpha_5$  subunits  
22 (23), the NS 3 $\alpha,21$ dihydroxy-5 $\alpha$ -pregnan-20-one (3 $\alpha$ 5 $\alpha$ -THDOC), pregnanolone and alphaxalone bind in a  
23 cleft between the  $\alpha$  subunits, with the C3-hydroxyl substituent of the steroids interacting directly with Q242  
24 in the  $\alpha$  subunit ( $\alpha$ Q242). PAM-NS activate these chimeric receptors, and their action is blocked by  $\alpha$ Q242L  
25 and  $\alpha$ Q242W mutations. These studies posit a single canonical intersubunit binding site for NS action that

1 is conserved across the six  $\alpha$  subunit isoforms (23,24,27).

2

3 An alternative body of evidence suggests that PAM-NS modulation of GABA<sub>A</sub>R function is mediated  
4 by multiple mechanisms and/or binding sites. Site-directed mutagenesis has identified multiple disparate  
5 residues on GABA<sub>A</sub>Rs that affect NS-induced activation, suggestive of two neurosteroid binding sites; one  
6 site mediating potentiation of GABA responses and the other mediating direct activation (25,26). Single  
7 channel electrophysiological studies (5,10,30) as well as studies examining neurosteroid modulation of  
8 [<sup>35</sup>S]t-butylbicyclophosphorothionate (TBPS) binding (31), have also identified multiple distinct effects of  
9 NS, with various structural analogues producing some or all of these effects, consistent with multiple NS  
10 binding sites (25,26). Our recent photolabeling studies have confirmed that there are multiple PAM-NS  
11 binding sites on  $\alpha_1\beta_3$  GABA<sub>A</sub>Rs (11). In addition to the canonical site at the interface between the TMDs  
12 of adjacent subunits (intersubunit site) (11,23,24,27), we identified NS binding sites within the  $\alpha$ -helical  
13 bundles of both the  $\alpha_1$  and  $\beta_3$  subunits (intrasubunit sites) of  $\alpha_1\beta_3$  GABA<sub>A</sub>Rs (11).  $3\alpha_5\alpha P$  binds to all three  
14 sites (11); mutagenesis of these sites suggests that the intersubunit and  $\alpha_1$  intrasubunit sites, but not the  $\beta_3$   
15 intrasubunit site, contribute to  $3\alpha_5\alpha P$  PAM activity (11). A functional effect for NS binding to the  $\beta_3$   
16 intrasubunit site has not been identified.

17

18 The  $3\alpha$ -hydroxyl ( $3\alpha$ -OH) group is critical to NS activation of GABA<sub>A</sub>Rs and  $3\beta$ -OH NS lack PAM  
19 activity (5,14). Indeed, many  $3\beta$ -OH NS are GABA<sub>A</sub>R NAMs (14,16). While molecular docking studies  
20 have suggested that the  $3\beta$ -OH NS epi-pregnanolone competes for binding with PAM-NS (23),  $3\beta$ -OH NS  
21 are non-competitive inhibitors with respect to GABA and  $3\alpha$ -OH NS, indicating that they are unlikely to  
22 act at the canonical PAM binding site (5,14). Steroids with a sulfate rather than a hydroxyl at the 3-carbon  
23 are also GABA<sub>A</sub>R NAMs thought to act at sites distinct from GABA<sub>A</sub>R PAMs (5,13,14,17,32). The precise  
24 location of this site is unclear, but crystallographic studies have demonstrated a possible binding site  
25 between TM3 and TM4 on the intracellular end of the  $\alpha$ -subunit TMD (17,24). While  $3\beta$ -OH NS and PS  
26 both inhibit GABA<sub>A</sub>Rs, they likely act via interactions with distinct sites (5,13,14,16,17,23,24).

1  
2 The goal of the current study was to determine the specific sites underlying the PAM and NAM actions  
3 of NS. We hypothesized that various NS analogues preferentially bind to one or more of the three NS  
4 binding sites in the  $\alpha_1\beta_3$  GABA<sub>A</sub>R, stabilizing distinct conformational states (i.e. resting, open or  
5 desensitized). To achieve this goal, we used two endogenous NS, the PAM-NS 3 $\alpha$ 5 $\alpha$ P and the NAM-NS  
6 3 $\beta$ 5 $\alpha$ P and two NS analogues, KK148 and KK150, in which a diazirine replaced the function-critical 3-OH  
7 group (33). We examined site-specific NS binding and effects using NS photolabeling (28,34-36) and  
8 measurements of channel gating and orthosteric ligand binding. The NS lacking a 3 $\alpha$ -OH were devoid of  
9 PAM-NS activity, but surprisingly, KK148 and 3 $\beta$ 5 $\alpha$ P enhanced the affinity of [<sup>3</sup>H]muscimol binding. We  
10 interpret this finding as evidence that these compounds preferentially bind to and stabilize desensitized  
11 receptors, since both open and desensitized GABA<sub>A</sub>R exhibit enhanced orthosteric ligand binding affinity  
12 (37).

13  
14 The results show that 3 $\alpha$ 5 $\alpha$ P binds to the canonical  $\beta(+)$ - $\alpha(-)$  intersubunit site, stabilizing the open state  
15 of the receptor, whereas the 3-diazirinylyl NS (KK148 and KK150) bind to this site but do not promote  
16 channel opening, and 3 $\beta$ 5 $\alpha$ P does not occupy this site. These data indicate that NS binding to the  
17 intersubunit sites is largely responsible for PAM activity and that the 3 $\alpha$ -OH is critical for NS activation. In  
18 contrast, 3 $\alpha$ 5 $\alpha$ P, 3 $\beta$ 5 $\alpha$ P and the 3-diazirinylyl NS all bind to both the  $\alpha_1$  and  $\beta_3$  intrasubunit sites. Occupancy  
19 of the intrasubunit sites by 3 $\alpha$ 5 $\alpha$ P, 3 $\beta$ 5 $\alpha$ P and KK148 promotes receptor desensitization. KK150 occupies  
20 all three NS binding sites on  $\alpha_1\beta_3$  GABA<sub>A</sub>Rs, but produces minimal functional effect suggesting a possible  
21 scaffold for a general NS antagonist. These results shed new light on the mechanisms of NS allosteric  
22 modulation of channel function, and demonstrate a novel pharmacology in which related ligands bind to  
23 different subsets of functional sites on the same protein, each in a state-dependent manner, with the actions  
24 at these sites summing to produce a net physiological effect.

25

## 1 RESULTS

### 2 *Distinct patterns of NS potentiation and enhancement of muscimol binding.*

3 The endogenous NS, 3 $\alpha$ 5 $\alpha$ P is known to potentiate GABA-elicited currents (Figure 1A) and enhance  
4 [ $^3$ H]muscimol binding to  $\alpha_1\beta_3$  GABA<sub>A</sub>Rs (Figure 1E) (11,18). We examined a series of NS analogues with  
5 different stereochemistries or substituents in the 3- and 17-positions: 3 $\beta$ 5 $\alpha$ P, KK148, and KK150 (structures  
6 shown in Figures 1B-D) for their ability to potentiate GABA-elicited currents and enhance orthosteric  
7 agonist ([ $^3$ H]muscimol) binding. 3 $\beta$ 5 $\alpha$ P is the 3 $\beta$ -epimer of 3 $\alpha$ 5 $\alpha$ P. KK148 and KK150 are NS analogue  
8 photolabeling reagents, which have a 3-diaziriny moiety instead of the 3-OH, and differ from each other  
9 by the stereochemistry of the 17-ether linkage (33). We observed a discrepancy between the ability of these  
10 compounds to potentiate GABA-elicited currents and their ability to enhance [ $^3$ H]muscimol binding in  $\alpha_1\beta_3$   
11 GABA<sub>A</sub>Rs. None of the NS analogues lacking a 3 $\alpha$ -OH potentiated GABA-elicited currents (Figures 1B-  
12 D). However, both 3 $\beta$ 5 $\alpha$ P and KK148 significantly enhanced [ $^3$ H]muscimol binding (Figure 1E). KK150,  
13 in contrast, did not potentiate GABA-elicited currents and minimally enhanced [ $^3$ H]muscimol binding  
14 (Figures 1D-E). Collectively, these data show that, NS analogues with different stereochemistry or  
15 substituents at the 3- and 17-positions show distinct patterns in modulation of  $\alpha_1\beta_3$  GABA<sub>A</sub>R currents and  
16 orthosteric ligand binding. We hypothesized that these patterns are a consequence of the various NS  
17 analogues stabilizing distinct conformational states of the GABA<sub>A</sub>R, possibly by binding and acting at  
18 different sites. Notably, the compounds with a 3-OH (3 $\alpha$ 5 $\alpha$ P, 3 $\beta$ 5 $\alpha$ P) are ten-fold more potent than those  
19 with a 3-diazirine (KK148, KK150) in enhancing [ $^3$ H]muscimol binding (Figure 1E), suggesting that the 3-  
20 OH is an important determinant of binding affinity to the site(s) mediating these effects.

21

### 22 *State-specific actions of NS analogues.*

23 To determine why 3 $\beta$ 5 $\alpha$ P and KK148 enhance [ $^3$ H]muscimol binding but do not potentiate  $\alpha_1\beta_3$   
24 GABA<sub>A</sub>R currents, we first considered the possibility that 3 $\beta$ 5 $\alpha$ P- and KK148-induced enhancement of  
25 [ $^3$ H]muscimol binding is a selective effect on intracellular GABA<sub>A</sub>Rs, since the radioligand binding assay  
26 was performed on total membrane homogenates, whereas the electrophysiological assays report only from

1 cell surface channels. NS are known to have effects on intracellular GABA<sub>A</sub>Rs and have been shown to  
2 accelerate GABA<sub>A</sub>R trafficking (38-40). To test this possibility, we examined [<sup>3</sup>H]muscimol binding in  
3 intact cells (i.e. binding to receptors only in the plasma membrane) (41-43) compared to permeabilized cells  
4 (plasma membranes plus intracellular membranes). Notably, [<sup>3</sup>H]muscimol binding was two-fold greater in  
5 permeabilized cells than in intact cells, indicating a significant population of intracellular GABA<sub>A</sub>Rs.  
6 KK148 enhanced [<sup>3</sup>H]muscimol binding in intact cells as much or more than in permeabilized cells,  
7 indicating that this effect is not a result of selective NS actions on intracellular receptors (Figure 1–figure  
8 supplement 1).

9  
10 A second possibility is that 3β5αP and KK148 selectively bind to and stabilize a desensitized state of  
11 the GABA<sub>A</sub>R. This would result in enhanced [<sup>3</sup>H]muscimol binding, since both open and desensitized  
12 receptors exhibit increased orthosteric ligand affinity in comparison to the resting state (11,18,37). To  
13 examine the effect of these NS analogues on desensitization, we maximally activated α<sub>1</sub>β<sub>3</sub> GABA<sub>A</sub>R with  
14 1 mM GABA and tested the effect of the NS on steady-state currents (44). KK148 and 3β5αP both decreased  
15 steady-state currents (Figures 2A and 2C), whereas KK150 did not (Figure 2B). To further delineate the  
16 electrophysiological effects of these compounds we focused on 3β5αP, since it is an endogenous NS and  
17 we had limited availability of KK148. 3β5αP preferentially inhibited steady-state rather than peak currents,  
18 indicating that inhibition is unlikely to be a rapidly-developing channel blocking effect. The inhibitory  
19 effect was also not observed in the α<sub>1</sub>(V256S)β<sub>3</sub> TM2 pore-lining mutation, which was previously shown  
20 to remove the desensitizing effects of sulfated steroids (13,14) (Figure 2D). While both 3α5αP and 3β5αP  
21 enhance [<sup>3</sup>H]muscimol binding, the former predominantly results in receptor activation while the latter  
22 results in desensitization. Consistent with this, the α<sub>1</sub>(V256S)β<sub>3</sub> mutation which abolishes NS-induced  
23 desensitization (13,14) eliminated [<sup>3</sup>H]muscimol binding enhancement by 3β5αP but not 3α5αP (Figure 3).  
24 We infer that 3α5αP increases [<sup>3</sup>H]muscimol binding by stabilizing an active state of the receptor, whereas  
25 3β5αP increases [<sup>3</sup>H]muscimol binding by stabilizing a desensitized state of the receptor which is absent in  
26 the α<sub>1</sub>(V256S)β<sub>3</sub> receptor. Collectively, these data indicate that 3β5αP and KK148 stabilize a desensitized

1 state of the GABA<sub>A</sub>R, thus enhancing orthosteric ligand affinity.

2

3 ***Quantitative comparison of the effects of 3β5αP on [<sup>3</sup>H]muscimol binding and receptor desensitization.***

4 While there is qualitative agreement between the relative effects of the various NS analogues on  
5 orthosteric ligand binding and receptor desensitization, there is an apparent quantitative discrepancy in the  
6 magnitude of the effects. For example, 3β5αP enhances [<sup>3</sup>H]muscimol binding by two-fold (Figure 1E),  
7 whereas it reduces steady-state current by only ~25% (Figure 2C). To address this difference, we first  
8 considered that the radioligand binding and electrophysiological assays are performed under different  
9 experimental conditions. The radioligand binding studies are performed using low [<sup>3</sup>H]muscimol  
10 concentrations to allow for sufficient dynamic range of ligand binding. In contrast the desensitization  
11 experiments are performed at high orthosteric ligand (GABA) concentration to achieve high peak open  
12 probability and steady-state receptor desensitization, thus minimizing the number of channels in the resting  
13 state. To address the quantitative differences in results from the two assays, we analyzed the  
14 electrophysiological data in the framework of the three-state Resting-Open-Desensitized model (44,45).  
15 We assumed that both the open and desensitized states had higher affinity for muscimol than the resting  
16 state, and that the affinities were similar and could be treated as equal. We then calculated the predicted  
17 occupancy of the high affinity states ( $P_{\text{open}} + P_{\text{desensitized}}$ ) using parameters derived from the functional  
18 responses, to compare to the observed changes in binding. The raw current amplitudes of peak and steady-  
19 state responses were converted to units of open probability as described previously in detail (46), and the  
20 probabilities of being in the open ( $P_{\text{open}}$ ) or desensitized ( $P_{\text{desensitized}}$ ) states were calculated for different  
21 experimental conditions (see Methods).

22

23 Application of 1 mM GABA elicited a current response that had a peak  $P_{\text{open}}$  of  $0.71 \pm 0.25$  ( $n = 16$ ).  
24 The  $P_{\text{open}}$  of the steady-state response was  $0.121 \pm 0.033$  ( $n = 7$ ), that was reduced to  $0.077 \pm 0.013$  ( $n = 5$ )  
25 with 3 μM 3β5αP. Analysis of steady-state currents using the Resting-Open-Desensitized model indicates  
26 that the steady-state  $P_{\text{desensitized}}$  is 0.829 in the presence of GABA, and 0.892 in the presence of GABA +



1 steroid. The relatively small increase in the sum of ( $P_{\text{open}} + P_{\text{desensitized}}$ ) (from 0.95 to 0.97) is due to the use  
2 of saturating GABA in these experiments. In the presence of lower concentrations of GABA, i.e., lower  
3 levels of activation, the predicted increase in the sum of ( $P_{\text{open}} + P_{\text{desensitized}}$ ) is greater. For example, for the  
4 condition where GABA elicits a peak response with  $P_{\text{open}}$  of 0.01, the predicted steady-state  $P_{\text{open}}$  is 0.0094  
5 and the predicted  $P_{\text{desensitized}}$  0.0643 (sum of the two equals 0.0737). In the presence of GABA +  $3\beta 5\alpha\text{P}$ , the  
6 predicted steady-state  $P_{\text{open}}$  is 0.0090 and the predicted  $P_{\text{desensitized}}$  0.1045 (sum of 0.1135), thus showing a  
7 54% increase in the sum of ( $P_{\text{open}} + P_{\text{desensitized}}$ ). Incidentally, this example demonstrates the need to use high  
8 concentrations of GABA to observe a meaningful reduction in steady-state  $P_{\text{open}}$  in the presence of  $3\beta 5\alpha\text{P}$ .

9  
10 To more directly compare the data from the radioligand binding and electrophysiology experiments, we  
11 exposed oocytes containing  $\alpha_1\beta_3$  GABA<sub>A</sub>Rs to 20 nM muscimol and recorded currents before and after co-  
12 application of 3  $\mu\text{M}$   $3\beta 5\alpha\text{P}$ . The percent reduction in steady-state current following  $3\beta 5\alpha\text{P}$  exposure was  
13 measured and used to estimate the relative probabilities of closed, open and desensitized receptors. The  
14 application of 20 nM muscimol elicited a peak response with  $P_{\text{open}}$  of  $0.012 \pm 0.004$  ( $n = 6$ ). The steady-  
15 state  $P_{\text{open}}$  was  $0.011 \pm 0.004$ . In the same cells, subsequent exposure to 3  $\mu\text{M}$   $3\beta 5\alpha\text{P}$  reduced the steady-  
16 state  $P_{\text{open}}$  to  $0.009 \pm 0.004$ . The calculated steady-state  $P_{\text{desensitized}}$  was 0.1001 in the presence of muscimol,  
17 and 0.2168 in the presence of muscimol +  $3\beta 5\alpha\text{P}$ . Thus, there is a predicted two-fold increase in the sum of  
18 ( $P_{\text{open}} + P_{\text{desensitized}}$ ) when the steroid is combined with muscimol. This is consistent with the doubling of  
19 muscimol binding caused by  $3\beta 5\alpha\text{P}$  in the [<sup>3</sup>H]muscimol binding experiments (Figure 1E). Overall, the data  
20 indicate that relatively small changes in steady-state current can be associated with relatively large changes  
21 in the occupancy of high-affinity states.

22

### 23 ***Binding site selectivity for NS analogues.***

24 To determine whether KK148 and  $3\beta 5\alpha\text{P}$  stabilize the desensitized conformation of the GABA<sub>A</sub>R by  
25 selectively binding to one or more of the identified NS binding sites on the GABA<sub>A</sub>R (11), we first  
26 determined which of the identified NS sites they bind. We have previously shown that the  $3\alpha 5\alpha\text{P}$ -analogue

1 photolabeling reagent, KK200 labels the  $\beta_3(+)$ - $\alpha_1(-)$  intersubunit ( $\beta_3$ G308) and  $\alpha_1$  intrasubunit ( $\alpha_1$ N408)  
2 sites on  $\alpha_1\beta_3$  GABA<sub>A</sub>Rs (Figure 4A), and that photolabeling can be prevented by a ten-fold excess of 3 $\alpha$ 5 $\alpha$ P  
3 (11). As a first step to determine the binding sites for 3 $\beta$ 5 $\alpha$ P, KK148 or KK150, we examined whether a  
4 ten-fold excess of these compounds (30  $\mu$ M) prevented KK200 (3  $\mu$ M) photolabeling of either binding site.  
5 Photolabeling was performed on membranes from HEK293 cells transfected with epitope-tagged  $\alpha_{1\text{His-}}$   
6  $\text{FLAG}\beta_3$  receptors, mimicking the conditions used in the [<sup>3</sup>H]muscimol binding assays and photolabeled  
7 residues were identified and labeling efficiency was determined using middle-down mass spectrometry (11).  
8 KK148, KK150, 3 $\alpha$ 5 $\alpha$ P and 3 $\beta$ 5 $\alpha$ P all prevented KK200 photolabeling of  $\alpha_1$ N408 in the  $\alpha_1$  intrasubunit site  
9 (Figure 4B), consistent with their binding to this site. In contrast, KK148, KK150 and 3 $\alpha$ 5 $\alpha$ P but not 3 $\beta$ 5 $\alpha$ P  
10 prevented labeling of  $\beta_3$ G308 in the intersubunit site (Figure 4C), indicating that 3 $\beta$ 5 $\alpha$ P does not bind to  
11 the intersubunit site.

12  
13 The KK148- and KK150-photolabeled samples were also analyzed to directly identify the sites of  
14 adduction. In both the KK148- and KK150-labeled samples, photolabeled peptides were identified from  
15 the TM4 helices of both the  $\alpha_1$  and  $\beta_3$  subunits. The labeled peptides had longer chromatographic elution  
16 times than the corresponding unlabeled peptides and corresponded with high mass accuracy (< 20 ppm) to  
17 the predicted mass of the unlabeled peptides plus the add weight minus N<sub>2</sub> of KK148 or KK150 (Figure 4–  
18 figure supplement 1). Product ion (MS2) spectra of the KK148- and KK150-labeled peptides from the  $\alpha_1$   
19 subunit identified the labeled residue as Y415 for both KK148 and KK150 (Figures 4D-E, Figure 4–figure  
20 supplement 2); Y415 is the same residue labeled by KK123 at the  $\alpha_1$  intrasubunit site (11). The KK148 and  
21 KK150 labeled peptides in TM4 of the  $\beta_3$  subunit and corresponding unlabeled peptide were identified by  
22 fragmentation spectra as  $\beta_3$ TM4 I426-N445. These data support labeling of the  $\beta_3$  intrasubunit site by  
23 KK148 and KK150. Fragmentation spectra of the peptide-sterol adducts were not adequate to determine  
24 the precise labeled residue because of low photolabeling efficiency (0.13% for KK148; 0.19% for KK150,  
25 Figure 4–figure supplement 1). No photolabeled peptides were identified in the  $\beta_3(+)$ - $\alpha_1(-)$  intersubunit site.  
26 This is likely because KK148 and KK150, similar to KK123, utilize an aliphatic diazirine that preferentially

1 labels nucleophilic residues (28,34,47); such residues are not present in the intersubunit site.

2

3 We have also shown that KK123 labeling of the  $\alpha_1$  intrasubunit ( $\alpha_1$ Y415) and  $\beta_3$  intrasubunit ( $\beta_3$ Y442)  
4 sites (Figure 5A) can be prevented by a ten-fold excess of  $3\alpha_5\alpha P$  (11). We thus examined whether  $3\beta_5\alpha P$   
5 ( $30 \mu M$ ) inhibited photolabeling by KK123 ( $3 \mu M$ ).  $3\beta_5\alpha P$  completely inhibited KK123 photolabeling at  
6 both intrasubunit sites (Figures 5B-C). Collectively the data show that KK148, KK150 and  $3\alpha_5\alpha P$  bind to  
7 all three of the identified NS binding sites. In contrast,  $3\beta_5\alpha P$  selectively binds to the two intrasubunit  
8 binding sites, but not to the canonical  $\beta_3(+)-\alpha_1(-)$  intersubunit site.

9

#### 10 ***Orthosteric ligand binding enhancement by NS analogues is mediated by distinct sites.***

11 To determine which of the previously identified binding sites contributes to NS enhancement of  
12 [ $^3H$ ]muscimol binding, we performed site-directed mutagenesis of the NS binding sites previously  
13 determined by photolabeling (Figure 6A) (11). Specifically,  $\alpha_1(Q242L)\beta_3$  targets the  $\beta_3(+)-\alpha_1(-)$   
14 intersubunit site,  $\alpha_1(N408A/Y411F)\beta_3$  and  $\alpha_1(V227W)\beta_3$  the  $\alpha_1$  intrasubunit site, and  $\alpha_1\beta_3(Y284F)$  the  $\beta_3$   
15 intrasubunit site. Mutations in the  $\beta_3(+)-\alpha_1(-)$  intersubunit and  $\alpha_1$  intrasubunit sites decreased  $3\alpha_5\alpha P$   
16 enhancement of [ $^3H$ ]muscimol binding by  $\sim 80\%$ , while mutation of the  $\beta_3$  intrasubunit site led to a small  
17 decrease (Figure 6B, Table 1). The residual enhancement of [ $^3H$ ]muscimol binding observed in receptors  
18 with mutations in the intersubunit or  $\alpha_1$  intrasubunit site occurs at ten-fold higher concentrations of  $3\alpha_5\alpha P$   
19 than WT and receptors with mutations in the  $\beta_3$  intrasubunit site (Table 1), suggesting that  $3\alpha_5\alpha P$  binds to  
20 the  $\beta_3$  intrasubunit site with lower affinity. In contrast, mutations in the  $\alpha_1$  and  $\beta_3$  intrasubunit sites, but not  
21 the intersubunit site decreased the enhancement of [ $^3H$ ]muscimol binding by  $3\beta_5\alpha P$  and KK148 (Figures  
22 6C-D, Table 1). To confirm that the effect of these mutations on NS effect are steroid-specific, we also  
23 tested their effect on etomidate, which enhances [ $^3H$ ]muscimol binding in  $\alpha_1\beta_3$  GABA<sub>A</sub>Rs and acts through  
24 a binding site distinct from NS (48,49). The mutations targeting NS binding sites resulted in modest  
25 decreases in [ $^3H$ ]muscimol binding enhancement by etomidate; however, the  $\alpha_1\beta_3(M286W)$  mutation which  
26 abolishes etomidate potentiation and activation of GABA<sub>A</sub>Rs (50,51), also abolished [ $^3H$ ]muscimol binding

1 enhancement (Figure 6E).

2

3 We did not test the effects of mutations on KK150 action because it minimally enhances [<sup>3</sup>H]muscimol  
4 binding. However, KK150 binds to all three of the identified NS binding sites, and may thus be a weak  
5 partial agonist or antagonist at the sites mediating NS enhancement of [<sup>3</sup>H]muscimol binding. Consistent  
6 with this prediction, KK150 inhibited enhancement of [<sup>3</sup>H]muscimol binding by 3 $\alpha$ 5 $\alpha$ P and KK148 (Figure  
7 7).

8

9 Collectively, these results show that multiple NS binding sites contribute to enhancement of  
10 [<sup>3</sup>H]muscimol affinity and that potentiating NS (3 $\alpha$ 5 $\alpha$ P) and non-potentiating NS (3 $\beta$ 5 $\alpha$ P, KK148 and  
11 KK150) have both common and distinct sites of action. Specifically, 3 $\alpha$ 5 $\alpha$ P enhances [<sup>3</sup>H]muscimol binding  
12 through all three sites but predominantly through the intersubunit and  $\alpha_1$  intrasubunit sites, which we have  
13 previously shown mediate PAM-NS potentiation (11). In contrast, 3 $\beta$ 5 $\alpha$ P and KK148 enhance  
14 [<sup>3</sup>H]muscimol binding exclusively through the  $\alpha_1$  and  $\beta_3$  intrasubunit sites. KK150 antagonizes the effects  
15 of KK148 on [<sup>3</sup>H]muscimol binding, presumably via the intrasubunit sites, and antagonizes the effects of  
16 3 $\alpha$ 5 $\alpha$ P, possibly via all three sites. These data indicate that NS binding to both the intersubunit and  
17 intrasubunit sites contributes to 3 $\alpha$ 5 $\alpha$ P enhancement of [<sup>3</sup>H]muscimol binding, but that only the intrasubunit  
18 binding sites contribute to the effects of 3 $\beta$ 5 $\alpha$ P and KK148.

19

20 It is important to note that the [<sup>3</sup>H]muscimol binding curves in Figure 6 are normalized to control. The  
21 raw data show that membranes containing WT receptors have 10-20-fold higher [<sup>3</sup>H]muscimol binding  
22 ( $B_{max}$ ) than membranes containing  $\alpha_1$ (N408A/Y411F) $\beta_3$  receptors (Figure 6-figure supplement 1A). The  
23 lower total [<sup>3</sup>H]muscimol binding observed in  $\alpha_1$ (N408A/Y411F) $\beta_3$  membranes is likely a consequence of  
24 decreased receptor expression. To assure that differences in NS effect between WT and  $\alpha_1$ (N408A/Y411F) $\beta_3$   
25 are not due to different muscimol affinities, we examined [<sup>3</sup>H]muscimol binding at a full range of  
26 concentrations. The  $\alpha_1$ (N408A/Y411F) $\beta_3$  mutations did not have a significant effect on [<sup>3</sup>H]muscimol

1 affinity (Figure 6–figure supplement 1B), but eliminated the modulatory effects of NS ( $3\alpha 5\alpha P$  and KK148)  
2 on [ $^3H$ ]muscimol affinity (Figure 6–figure supplement 1C-D and Figure 6–figure supplement 2). To assure  
3 that the effect of  $\alpha_1(N408A/Y411F)\beta_3$  was specific to NS, we also examined the effect of etomidate (a non-  
4 steroidal GABA<sub>A</sub>R PAM) on muscimol affinity. Etomidate enhanced [ $^3H$ ]muscimol affinity in both the WT  
5 and  $\alpha_1(N408A/Y411F)\beta_3$  receptors, indicating that the effect of these mutations are specific to NS action  
6 (Figure 6–figure supplement 1C-D).

7

### 8 ***3 $\beta$ 5 $\alpha$ P increases desensitization through binding to $\alpha_1$ and $\beta_3$ intrasubunit sites.***

9 To further explore the relationship between desensitization and enhancement of [ $^3H$ ]muscimol binding,  
10 we examined the consequences of mutations to these sites on physiological measurements of desensitization  
11 induced by NS. Again, these experiments were performed with  $3\beta 5\alpha P$  because it is the endogenous  $3\beta$ -OH  
12 NS and because of limited quantities of KK148. Desensitization was quantified by defining the baseline  
13 steady-state current at 1 mM GABA as 100% and measuring percent reduction of the steady-state current  
14 elicited by a NS (Figure 8A).  $3\beta 5\alpha P$  reduced the steady-state current (i.e. enhanced desensitization) by  $23.0$   
15  $\pm 2.8\%$  (% of desensitization: mean  $\pm$  SEM,  $n = 5$ , Figure 8A). Mutations in the  $\alpha_1$  and  $\beta_3$  intrasubunit sites  
16 [i.e.  $\alpha_1(N408A/Y411F)\beta_3$  and  $\alpha_1\beta_3(Y284F)$ , respectively] prevented  $3\beta 5\alpha P$ -enhanced desensitization by  
17  $\sim 67\%$  (Figure 8B), whereas mutation in the  $\beta(+)$ – $\alpha(-)$  intersubunit site [ $\alpha_1(Q242L)\beta_3$ ] was without effect  
18 (Figure 8C). Receptors with mutations in both the  $\alpha_1$  and  $\beta_3$  intrasubunit sites  
19 [ $\alpha_1(N408A/Y411F)\beta_3(Y284F)$ ] showed less NS-enhancement of desensitization than receptors with  
20 mutations in either of the intrasubunit sites alone, indicating that both intrasubunit sites contribute to the  
21 desensitizing effect (Figure 8C). Whereas the desensitizing effect of  $3\beta 5\alpha P$  is completely eliminated by the  
22 V2'S mutation  $\alpha_1(V256S)\beta_3$ , it is not completely eliminated by combined mutations of all three binding  
23 sites [ $\alpha_1(Q242L/N408A/Y411F)\beta_3(Y284F)$ ] (Figure 8C). This suggests either that the effects of the  
24 mutations are incomplete or there are additional unidentified NS binding sites contributing to  
25 desensitization. Since mutations of the  $\alpha_1$  and  $\beta_3$  intrasubunit sites also disrupt  $3\beta 5\alpha P$ -enhancement of  
26 [ $^3H$ ]muscimol binding (Figure 6C), we conclude that  $3\beta 5\alpha P$  binding to these intrasubunit sites stabilizes

1 the desensitized state of the GABA<sub>A</sub>R and thus enhances [<sup>3</sup>H]muscimol binding. Furthermore, KK148  
2 increased GABA<sub>A</sub>R desensitization (% of desensitization =  $27.2 \pm 6.0$ : mean  $\pm$  SEM,  $n = 3$ , Figure 2A) and  
3 the  $\alpha_1$ (V256S) $\beta_3$  mutation abolished the effect (% of desensitization = 0,  $n = 1$ ). These observations support  
4 the idea that binding of certain NS analogues to  $\alpha_1$  and  $\beta_3$  intrasubunit sites, increases GABA<sub>A</sub>R  
5 desensitization. In contrast, KK150 showed a very small effect on desensitization (% of desensitization =  
6  $2.1 \pm 0.7$ : mean  $\pm$  SEM,  $n = 5$ , Figure 2B), consistent with the small increase in [<sup>3</sup>H]muscimol binding by  
7 KK150 (Figure 1E).

8

### 9 ***The effects of 3 $\alpha$ 5 $\alpha$ P binding to intrasubunit sites on desensitization.***

10 3 $\alpha$ 5 $\alpha$ P binds to all three of the NS binding sites on  $\alpha_1\beta_3$  GABA<sub>A</sub>R, and mutations in all three sites reduce  
11 3 $\alpha$ 5 $\alpha$ P enhancement of [<sup>3</sup>H]muscimol binding (Figure 6B). This suggests the possibility that activation by  
12 3 $\alpha$ 5 $\alpha$ P (mediated primarily by the  $\beta_3(+)$ – $\alpha_1(-)$  intersubunit site) masks a desensitizing effect mediated  
13 through the  $\beta_3$  and/or  $\alpha_1$  intrasubunit binding sites. To determine whether intrasubunit binding sites mediate  
14 increased desensitization by 3 $\alpha$ 5 $\alpha$ P, we examined the effect of 3 $\alpha$ 5 $\alpha$ P on steady-state currents in receptors  
15 with mutations in the  $\alpha_1$  or  $\beta_3$  intrasubunit site. In these experiments,  $P_{open}$  was maximized by activating  
16 receptors with 1 mM GABA co-applied with 40  $\mu$ M pentobarbital (PB) (52) prior to application of 3 $\alpha$ 5 $\alpha$ P;  
17 this was necessary because several of the mutated receptors had a  $P_{open} \ll 1.0$  in response to 1 mM GABA  
18 alone. Mutations in the intrasubunit sites were prepared with a background  $\alpha_1$ (Q242L) $\beta_3$  mutation to remove  
19 3 $\alpha$ 5 $\alpha$ P activation (11,28,29,53) and focus on the effects of 3 $\alpha$ 5 $\alpha$ P on the equilibrium between the open and  
20 desensitized states.

21

22 3 $\alpha$ 5 $\alpha$ P produced a small reduction in steady-state current in  $\alpha_1$ (Q242L) $\beta_3$  receptors with mutations in  
23 neither of the intrasubunit sites (Figure 9A). This inhibitory effect was eliminated by  $\alpha_1$ (V256S) $\beta_3$ ,  
24 indicating that it was due to receptor desensitization (Figure 9D). In receptors with combined mutations in  
25 the intersubunit and  $\alpha_1$  intrasubunit sites [i.e.  $\alpha_1$ (Q242L/N408A/Y411F) $\beta_3$ ], 3 $\alpha$ 5 $\alpha$ P significantly inhibited  
26 the steady-state current (Figure 9B), an effect that was markedly reduced by mutations in the  $\beta_3$  intrasubunit

1 site [ $\alpha_1$ (Q242L) $\beta_3$ (Y284F)] (Figure 9C). These data suggest that 3 $\alpha$ 5 $\alpha$ P exerts a desensitizing effect by  
2 binding to the  $\beta_3$  intrasubunit site and that 3 $\alpha$ 5 $\alpha$ P binding to the  $\alpha_1$  intrasubunit site does not promote  
3 desensitization (Figure 9D). Notably, 3 $\alpha$ 5 $\alpha$ P exerted only a modest inhibitory effect in  $\alpha_1$ (Q242L) $\beta_3$   
4 receptors in which occupancy of the  $\beta_3$  intrasubunit site should promote inhibition. This may be due to a  
5 counterbalancing action at the  $\alpha_1$  intrasubunit site, where 3 $\alpha$ 5 $\alpha$ P binding contributes more to receptor  
6 activation as demonstrated by our previous observation that mutations in the  $\alpha_1$  intrasubunit site  
7 significantly reduce 3 $\alpha$ 5 $\alpha$ P potentiation of GABA-elicited currents (11). These results suggest that in  
8 addition to activation, 3 $\alpha$ 5 $\alpha$ P enhances receptor desensitization. Enhanced desensitization by the PAM-NS  
9 3 $\alpha$ 5 $\alpha$ P (54) and 3 $\alpha$ 5 $\alpha$ -THDOC (55,56) has been observed in prior studies supporting the current finding  
10 with 3 $\alpha$ 5 $\alpha$ P.

## 1 DISCUSSION

2 In this study we examined how site-specific binding to the three identified NS sites on  $\alpha_1\beta_3$  GABA<sub>A</sub>R  
3 (11) contributes to the PAM vs. NAM activity of epimeric 3-OH NS. We found that the PAM-NS 3 $\alpha$ 5 $\alpha$ P,  
4 but not the NAM-NS 3 $\beta$ 5 $\alpha$ P, binds to the canonical  $\beta_3(+)$ - $\alpha_1(-)$  intersubunit site that mediates receptor  
5 potentiation, explaining the absence of 3 $\beta$ 5 $\alpha$ P PAM activity. In contrast, 3 $\beta$ 5 $\alpha$ P binds to intrasubunit sites  
6 in the  $\alpha_1$  and  $\beta_3$  subunits, promoting receptor desensitization. Binding to the intrasubunit sites provides a  
7 mechanistic explanation for the NAM effects of 3 $\beta$ 5 $\alpha$ P (14). 3 $\alpha$ 5 $\alpha$ P also binds to the  $\beta_3$  intrasubunit site  
8 explaining the previously described desensitizing effect of the PAM-NS 3 $\alpha$ 5 $\alpha$ P (54) and 3 $\alpha$ 5 $\alpha$ -THDOC  
9 (55,56). Two synthetic NS with diazirine moieties at C3 (KK148 and KK150) were used to identify NS  
10 binding sites and shown to bind to the intersubunit as well as both intrasubunit sites. Neither of these ligands  
11 potentiated agonist-activated GABA<sub>A</sub>R currents, reinforcing the importance of the 3 $\alpha$ -OH group and its  
12 interaction with  $\alpha_1$ Q242 in PAM actions. KK148 is an efficacious desensitizing agent, acting through the  
13  $\alpha_1$  and  $\beta_3$  intrasubunit NS binding sites. KK150, the 17 $\alpha$ -epimer of KK148, binds to all three NS binding  
14 sites, but neither activates nor desensitizes GABA<sub>A</sub>Rs, suggesting a potential chemical scaffold for a general  
15 NS antagonist. Collectively, these data show that differential occupancy of and efficacy at three discrete NS  
16 binding sites determines whether a NS ligand has PAM, NAM, or potentially NS antagonist activity on  
17 GABA<sub>A</sub>Rs.

18  
19 The observation that 3 $\beta$ 5 $\alpha$ P and KK148 enhance orthosteric ligand binding but do not potentiate GABA-  
20 elicited currents first suggested that these NAM-NS selectively stabilize a desensitized conformation of the  
21 receptor (n.b. there may be multiple desensitized conformations of the receptor, possibly including NS-  
22 specific desensitized states, and our data does not address the specific conformations stabilized by NAM-  
23 NS. Strictly, our data indicate that the steroids stabilize a non-conducting state that has high affinity to the  
24 orthosteric agonist muscimol.) Chang and colleagues have shown that orthosteric ligand affinity (muscimol  
25 or GABA) is greater in desensitized and activated (open) GABA<sub>A</sub>Rs than in resting (closed) receptors, with  
26 estimated GABA  $K_D$  values of 78.5  $\mu$ M, 120 nM and 40 nM for the resting, activated and desensitized



1  $\alpha_1\beta_2\gamma_2$  receptors respectively (37). Our experimental and modeling data demonstrate that NAM-NS such as  
2  $3\beta_5\alpha P$  or KK148 enhance orthosteric ligand binding by increasing the population of receptors in a  
3 desensitized state. It is, however, unclear if  $3\beta_5\alpha P$  or KK148 can promote transition of resting receptors  
4 directly to a desensitized state, thus bypassing channel opening. We propose that in the presence of low  
5 concentrations of orthosteric agonists (as in the [ $^3H$ ]muscimol binding assays), there is a slow shift of  
6 receptors from resting through activated to a desensitized state with minimal change in the population of  
7 receptors in the activated state. The slow time course of accumulation of desensitized receptors is illustrated  
8 by experiments in which 10  $\mu M$   $3\beta_5\alpha P$  is added to membranes that have been fully equilibrated with a low  
9 concentration (3 nM) of [ $^3H$ ]muscimol and binding is measured as a function of time. Enhancement of  
10 [ $^3H$ ]muscimol binding by 10  $\mu M$   $3\beta_5\alpha P$  is slow, with a time constant of 4 min at 4 °C ( $\tau = 3.97 \pm 0.15$  min:  
11 mean  $\pm$  SEM,  $n = 4$ , Supplementary file 1). In contrast, when  $\alpha_1\beta_3$  GABA<sub>A</sub>Rs are exposed to long pulses of  
12 a high concentration of GABA, KK148- and  $3\beta_5\alpha P$ -induced desensitization is rapid (Figures 2A and 2C),  
13 since in these conditions almost all of the receptors are either in an open or desensitized conformation and  
14 desensitization is not slowed by the transition from resting to open state (57). Thus, the slow enhancement  
15 of [ $^3H$ ]muscimol binding by  $3\beta_5\alpha P$  (Supplementary file 1) is likely rate-limited by the transition of  
16 receptors to activated then to desensitized states at 3 nM muscimol rather than by  $3\beta_5\alpha P$  binding. These  
17 time course experiments are most consistent with a model in which receptors preferentially progress from  
18 the resting to active to desensitized states, which are then stabilized by the NAM-NS.

19  
20 The selective binding of  $3\beta_5\alpha P$  to a subset of identified NS binding sites provides an explanation for its  
21 NAM activity.  $3\beta_5\alpha P$  stabilizes desensitized receptors by binding to the  $\alpha_1$  and  $\beta_3$  intrasubunit sites, but  
22 does not activate the receptor because it does not bind to the intersubunit site. This site-selective binding is  
23 unexpected for several reasons. First, docking and free energy perturbation calculations in a prior study  
24 predicted that epi-pregnanolone ( $3\beta_5\beta P$ ) binds to the intersubunit site in a similar orientation and with free  
25 energies of binding that are equivalent to pregnanolone ( $3\alpha_5\beta P$ ) (23). The modeling suggested that  $3\beta_5\beta P$   
26 does not form a hydrogen bond with  $\alpha Q242$ , a possible explanation for its lack of efficacy (23). Our docking

1 studies also show similar binding energies and orientations of 3 $\beta$ 5 $\alpha$ P and 3 $\alpha$ 5 $\alpha$ P binding in the  $\beta_3(+)$ - $\alpha_1(-)$   
2 intersubunit site (Supplementary file 2). We have also shown that binding affinity or docking scores of NS  
3 binding to the intersubunit site is not significantly affected by mutations ( $\alpha_1$ Q242L,  $\alpha_1$ Q242W,  $\alpha_1$ W246L)  
4 that eliminate NS activation, although binding orientation is altered (28). These data indicate that NS  
5 binding in the intersubunit site is tolerant to significant changes in critical residues and NS ligand structure,  
6 and are consistent with our findings that NS analogues, such as KK148 and KK150, can bind to the  
7 intersubunit site but have no effect on activation (Figures 1 and 4). Thus, the peculiar lack of 3 $\beta$ 5 $\alpha$ P binding  
8 to the intersubunit site suggests that either: (1) details in the structure of the intersubunit site in the open  
9 conformation that explain the absence of 3 $\beta$ 5 $\alpha$ P binding are not apparent in current high-resolution  
10 structures or; (2) 3 $\beta$ 5 $\alpha$ P does not bind for other reasons. One plausible explanation is that 3 $\beta$ 5 $\alpha$ P, like  
11 cholesterol, has low chemical activity in the membrane and does not achieve sufficiently available  
12 concentration to bind in this site (58). This explanation would require that the chemical activity of 3 $\beta$ 5 $\alpha$ P  
13 differs between the inner and outer leaflets of a plasma membrane since 3 $\beta$ 5 $\alpha$ P binds to the intrasubunit  
14 sites.

15  
16 The functional analysis of mutations in each of the three NS binding sites demonstrates that the  
17 activating and desensitizing effects of NS result from occupancy of distinct sites. In particular, binding of  
18 certain NS (3 $\beta$ 5 $\alpha$ P, KK148) to  $\alpha_1$  and  $\beta_3$  intrasubunit sites modulates the open-desensitized equilibrium.  
19 Interestingly, lipid binding to intrasubunit pockets in bacterial pLGICs analogous to the  $\alpha_1$  and  $\beta_3$   
20 intrasubunit sites in GABA<sub>A</sub>R, also modulates receptor desensitization; docosahexaenoic acid binding to  
21 an intrasubunit site in GLIC (59) and phosphatidylglycerol in ELIC (60) increase and decrease agonist-  
22 induced desensitization, respectively. The combined results of mutational analyses and binding data  
23 demonstrate that the effects of various NS analogues are also a consequence of their efficacy at each of the  
24 sites they occupy. For example, KK148 and KK150 occupy the intersubunit site (Figure 4C), but do not  
25 activate GABA<sub>A</sub>R currents (Figures 1C-D), and KK150 occupies both intrasubunit sites (Figure 4B and  
26 Figure 4—figure supplement 1) but does not desensitize the receptor (Figure 2B).

1  
2 To explain the effects of the 3-substituted NS analogues, we propose a model in which NS-selective  
3 binding at three distinct binding sites on the GABA<sub>A</sub>R preferentially stabilizes specific states (resting, open,  
4 desensitized) of the receptor (Figure 10). Orthosteric agonist (GABA or muscimol) binding shifts the  
5 equilibrium towards high-affinity states (open and desensitized). 3 $\alpha$ 5 $\alpha$ P allosterically stabilizes the open  
6 state through binding to the  $\beta_3$ - $\alpha_1$  intersubunit and  $\alpha_1$  intrasubunit sites and stabilizes the desensitized state  
7 through the  $\beta_3$  intrasubunit site (Figure 10A). In contrast, 3 $\beta$ 5 $\alpha$ P preferentially stabilizes the desensitized  
8 state through binding to both intrasubunit sites (Figure 10B). KK148, like 3 $\beta$ 5 $\alpha$ P, stabilizes the desensitized  
9 state by binding to the intrasubunit sites (Figure 10C). KK148 also binds to the intersubunit site, presumably  
10 with no state-dependence, since it is neither an agonist nor an inverse-agonist (Figures 1C and 10C). KK150,  
11 which neither activates nor desensitizes GABA<sub>A</sub>Rs and is not an inverse agonist, binds to all three sites,  
12 again presumably with no-state dependence (Figures 1D and 10D). This model predicts that KK148 should  
13 act as a competitive antagonist to PAM-NS at the intersubunit site. Indeed, KK148 reduces 3 $\alpha$ 5 $\alpha$ P  
14 potentiation of GABA-elicited currents by about 24% (Supplementary file 3). The model also predicts that  
15 KK150 should be a competitive NS antagonist at all three binding sites. Consistent with this prediction,  
16 KK150 weakly antagonizes 3 $\alpha$ 5 $\alpha$ P potentiation of GABA-elicited currents (12%, Supplementary file 3)  
17 and antagonizes 3 $\alpha$ 5 $\alpha$ P and KK148 enhancement of [<sup>3</sup>H]muscimol binding (Figure 7). The modest  
18 antagonism of 3 $\alpha$ 5 $\alpha$ P potentiation observed with KK148 and KK150 is likely the result of these ligands  
19 having lower binding affinity than the 3-OH NS.

20  
21 The site-specific model of NS action (Figure 10) has significant implications for the synaptic  
22 mechanisms of PAM-NS action. At a synapse, GABA<sub>A</sub>Rs are transiently exposed to high (mM)  
23 concentrations of GABA leading to a channel P<sub>open</sub> approaching one (61,62). GABA is quickly cleared from  
24 the synapse leading to rapid deactivation with minimal desensitization (57,63). In the presence of a PAM-  
25 NS, deactivation is slowed, resulting in a prolongation of the inhibitory postsynaptic current (IPSC) and

1 increased inhibitory current (18,55,64,65). This effect is largely attributable to stabilization of the open  
2 state, presumably by binding to the intersubunit and  $\alpha_1$  intrasubunit binding sites. A second effect has been  
3 observed in which the PAM-NS  $3\alpha,5\alpha$ P (54) and  $3\alpha,5\alpha$ -THDOC (55) prolong the slow component of  
4 GABA<sub>A</sub>R desensitization and slow recovery from desensitization. This results in increased late channel  
5 openings (55,57) and IPSC prolongation (64,65). When the frequency of synaptic firing is rapid, the  
6 desensitizing effect of NS may also contribute to frequency-dependent reduction in IPSC amplitude (55,66).  
7 The desensitizing effect of  $3\alpha,5\alpha$ P is predominantly mediated by binding at the  $\beta_3$  intrasubunit site. The  
8 balance between stabilization of the open and desensitized channels should be determined by the relative  
9 occupancies for the intersubunit site of the active receptor and the  $\beta_3$  intrasubunit site of the desensitized  
10 receptor. Computational docking of  $3\alpha,5\alpha$ P to these sites indicates modest differences in affinity between  
11 the sites with a rank order affinity of: intersubunit >  $\alpha_1$  intrasubunit >  $\beta_3$  intrasubunit sites (Supplementary  
12 file 2) (11). Mutational analysis of the effects of NS on enhancement of [<sup>3</sup>H]muscimol binding also indicates  
13 that  $3\alpha,5\alpha$ P has a lower affinity to the  $\beta_3$  intrasubunit site (Figure 6B, Table 1). Thus binding to the  $\beta_3$   
14 intrasubunit site may serve as a negative feedback mechanism preventing excessive PAM-NS effects on  
15 synaptic currents.

16  
17 In summary, this study describes a unique NS pharmacology in which different NS analogues selectively  
18 bind to subsets of three sites on the  $\alpha_1\beta_3$  GABA<sub>A</sub>R, with each analogue exhibiting state-dependent binding  
19 at a given site. The combination of site-selectivity and state-dependence of binding determines whether a  
20 NS analogue is a PAM, a NAM or an antagonist of NS action at the GABA<sub>A</sub>R. It seems likely that other  
21 GABA<sub>A</sub>R subunit isoforms and heteropentameric subunit combinations will reveal additional NS binding  
22 sites with distinct affinity and state-dependence for various analogues. The identification of potent agonists  
23 and antagonists for each of these sites will provide tools for understanding the biological effects of  
24 endogenous neurosteroids and potentially for the development of precision neurosteroid therapeutics.

25

26

1 **FUNDING**

2 This work was funded by grants from the National Institutes of Health (NIH) including  
3 2R01GM108799-05 for A.S.E. and D.F.C.; 5K08GM126336-03 for W.W.C.; 5R01GM108580-06 for G.A.,  
4 and from the Taylor Family Institute for Innovative Psychiatric Research.

5

6 **ACKNOWLEDGEMENTS**

7 The authors thank Drs. Charles F. Zorumski, Steven Mennerick and Joseph Henry Steinbach for  
8 insightful advice and valuable suggestions.

9

10

## 1 MATERIALS AND METHODS

### 2 *Construct design*

3 The human  $\alpha_1$  and  $\beta_3$  subunits were subcloned into pcDNA3 for molecular manipulations and cRNA  
4 synthesis. Using QuikChange mutagenesis (Agilent Technologies, Santa Clara, CA), a FLAG tag was first  
5 added to the  $\alpha_1$  subunit then an octa-histidine tag was added to generate the following His-FLAG tag tandem  
6 (QPSLHHHHHHHHHDYKDDDDKDEL), inserted between the 4th and 5th residues of the mature peptide.  
7 The  $\alpha_1$  and  $\beta_3$  subunits were then transferred into the pcDNA4/TO and pcDNA5/TO vectors (Thermo Fisher  
8 Scientific), respectively, for tetracycline inducible expression. Point mutations were generated using the  
9 QuikChange site-directed mutagenesis kit and the coding region fully sequenced prior to use. The cDNAs  
10 were linearized with Xba I (NEB Labs, Ipswich, MA), and the cRNAs were generated using T7 mMessage  
11 mMachine (Ambion, Austin, TX).

12

### 13 *Cell culture and generation of stable cell line*

14 Cell culture was performed as described in previous reports (11). The tetracycline inducible cell line T-  
15 REx<sup>TM</sup>-HEK293 (Thermo Fisher Scientific) was cultured under the following conditions: cells were  
16 maintained in DMEM/F-12 50/50 medium containing 10% fetal bovine serum (tetracycline-free, Takara,  
17 Mountain View, CA), penicillin (100 units/ml), streptomycin (100 g/ml), and blasticidin (2  $\mu$ g/ml) at 37 °C  
18 in a humidified atmosphere containing 5% CO<sub>2</sub>. Cells were passaged twice each week, maintaining  
19 subconfluent cultures. Stably transfected cells were cultured as above with the addition of hygromycin (50  
20  $\mu$ g/ml) and zeocin (20  $\mu$ g/ml). A stable cell line was generated by transfecting T-REx<sup>TM</sup>-HEK293 cells with  
21 human  $\alpha_1$ -8xHis-FLAG pcDNA4/TO and human  $\beta_3$  pcDNA5/TO, in a 150 mm culture dish, using the  
22 Effectene transfection reagent (Qiagen). Two days after transfection, selection of stably transfected cells  
23 was performed with hygromycin and zeocin until distinct colonies appeared. Medium was exchanged  
24 several times each week to maintain antibiotic selection. Individual clones were selected from the dish and  
25 transferred to 24-well plates for expansion of each clone selected. When the cells grew sufficiently, about  
26 50% confluency, they were split into two other plates, one for a surface ELISA against the FLAG epitope

1 and a second for protein assay, to normalize surface expression to cell number. The best eight clones were  
2 selected for expansion into 150 mm dishes, followed by [<sup>3</sup>H]muscimol binding to examine the receptor  
3 density. Once the best expressing clone was determined, the highest expressing cells of that clone were  
4 selected through fluorescence activated cell sorting.

5

### 6 ***Membrane protein preparation***

7 Stably transfected cells were plated into dishes. After reaching 50% confluency, GABA receptors were  
8 expressed by inducing cells with 1 µg/ml of doxycycline with the addition of 5 mM sodium butyrate. Cells  
9 were harvested 48 to 72 hours after induction. HEK cells, after induction, grown to 100% confluency were  
10 harvested and washed with 10 mM potassium phosphate, 100 mM potassium chloride (pH 7.5) plus protease  
11 inhibitors (Sigma) two times. The cells were collected by centrifugation at 1,000 g at 4 °C for 5 min. The  
12 cells were homogenized with a glass mortar and a Teflon pestle for ten strokes on ice. The pellet containing  
13 the membrane proteins was collected after centrifugation at 20,000 g at 4 °C for 45 min and resuspended  
14 in a buffer containing 10 mM potassium phosphate, 100 mM potassium chloride (pH 7.5). The protein  
15 concentration was determined with micro-BCA protein assay and stored at -80 °C.

16

### 17 ***Photolabeling and purification of $\alpha_1\beta_3$ GABA<sub>A</sub>R***

18 The syntheses of neurosteroid photolabeling reagents (KK148, KK150, KK200, KK123) are detailed in  
19 previous reports (33,36). For all the photolabeling experiments, 10-20 mg of HEK cell membrane proteins  
20 (about 300 pmol [<sup>3</sup>H]muscimol binding) were thawed and resuspended in buffer containing 10 mM  
21 potassium phosphate, 100 mM potassium chloride (pH 7.5) and 1 mM GABA at a final concentration of  
22 1.25 mg/ml. For the photolabeling competition experiments, 3 µM KK200 or KK123 in the presence of 30  
23 µM competitor (3 $\alpha$ 5 $\alpha$ P, KK148, KK150, and 3 $\beta$ 5 $\alpha$ P) or the same volume of ethanol was added to the  
24 membrane proteins and incubated on ice for 1 h. The samples were then irradiated in a quartz cuvette for 5  
25 min, by using a photoreactor emitting light at > 320 nm. The membrane proteins were then collected by  
26 centrifugation at 20,000 g at 4 °C for 45 min. The photolabeled membrane proteins were resuspended in

1 lysis buffer containing 1% *n*-dodecyl- $\beta$ -D-maltoside (DDM), 0.25% cholesteryl hemisuccinate (CHS), 50  
2 mM Tris (pH 7.5), 150 mM NaCl, 2 mM CaCl<sub>2</sub>, 5 mM KCl, 5 mM MgCl<sub>2</sub>, 1 mM EDTA, 10% glycerol at  
3 a final concentration of 1 mg/ml. The membrane protein suspension was homogenized using a glass mortar  
4 and a Teflon pestle and incubated at 4 °C overnight. The protein lysate was centrifuged at 20,000 g at 4 °C  
5 for 45 min and supernatant was incubated with 0.5 ml anti-FLAG agarose (Sigma) at 4 °C for 2 h. The anti-  
6 FLAG agarose was then transferred to an empty column, followed by washing with 20 ml washing buffer  
7 (50 mM triethylammonium bicarbonate and 0.05% DDM). The GABA<sub>A</sub>Rs were eluted with aliquots of 200  
8  $\mu$ g/ml FLAG tag peptide and 100  $\mu$ g/ml 3X FLAG (ApexBio) in the washing buffer. The pooled eluates (9  
9 ml) containing GABA<sub>A</sub>Rs were concentrated to 100  $\mu$ l using 100 kDa cut-off centrifugal filters.

10

### 11 ***Tryptic middle-down MS analysis***

12 The purified  $\alpha_1\beta_3$  GABA<sub>A</sub>R (100  $\mu$ l) was reduced with 5 mM tris(2-carboxyethyl)phosphine for 1 h,  
13 alkylated with 5 mM *N*-ethylmaleimide (NEM) for 1 h, and quenched with 5 mM dithiothreitol (DTT) for  
14 15 min. These three steps were done at RT. Samples were then digested with 8  $\mu$ g of trypsin for 7 days at  
15 4 °C to obtain maximal recovery of TMD peptides. Next, the digestion was terminated by adding formic  
16 acid in a final concentration of 1%, followed directly by LC-MS analysis on an Orbitrap Elite mass  
17 spectrometer. 20  $\mu$ l samples were injected into a home-packed PLRP-S (Agilent) column (10 cm x 75  $\mu$ m,  
18 300 Å), separated with a 145 min gradient from 10 to 90% acetonitrile, and introduced to the mass  
19 spectrometer at 800 nl/min with a nanospray source. MS acquisition was set as a MS1 Orbitrap scan  
20 (resolution of 60,000) followed by top 20 MS2 Orbitrap scans (resolution of 15,000) using data-dependent  
21 acquisition, and exclusion of singly charged precursors. Fragmentation was performed using high-energy  
22 dissociation with normalized energy of 35%. Analysis of data sets was performed using Xcalibur (Thermo  
23 Fisher Scientific) to manually search for TM1, TM2, TM3 or TM4 tryptic peptides with or without  
24 neurosteroid photolabeling modifications. Photolabeling efficiency was estimated by generating extracted  
25 chromatograms of unlabeled and labeled peptides, determining the area under the curve, and calculating  
26 the abundance of labeled peptide/(unlabeled + labeled peptide). Analysis of statistical significance



1 comparing the photolabeling efficiency of KK200 and KK123 for  $\alpha_1\beta_3$  GABA<sub>A</sub>R was determined using  
2 one-way ANOVA with *post hoc* Bonferroni correction and paired *t*-test, respectively (GraphPad Prism 6).  
3 MS2 spectra of photolabeled TMD peptides were analyzed by manual assignment of fragment ions with  
4 and without photolabeling modification. Fragment ions were accepted based on the presence of a  
5 monoisotopic mass within 20 ppm mass accuracy. In addition to manual analysis, PEAKS (Bioinformatics  
6 Solutions Inc.) database searches were performed for data sets of photolabeled  $\alpha_1\beta_3$  GABA<sub>A</sub>R. Search  
7 parameters were set for a precursor mass accuracy of 20 ppm, fragment ion accuracy of 0.1 Da, up to 3  
8 missed cleavages on either end of the peptide, false discovery rate of 0.1%, and variable modifications of  
9 methionine oxidation, cysteine alkylation with NEM and DTT, and NS analogue photolabeling reagents on  
10 any amino acid.

11

## 12 ***Radioligand binding assays***

13 [<sup>3</sup>H]muscimol binding assays were performed using a previously described method (11). HEK cell  
14 membrane proteins (100 µg/ml final concentration) were incubated with 3 nM [<sup>3</sup>H]muscimol (30 Ci/mmol;  
15 PerkinElmer Life Sciences), neurosteroid (3 nM–30 µM) or etomidate (30 nM–200 µM) in different  
16 concentrations, binding buffer (10 mM potassium phosphate, 100 mM potassium chloride, pH 7.5), in a  
17 total volume of 1 ml. Assay tubes were incubated for 1 h on ice in the dark. Nonspecific binding was  
18 determined by binding in the presence of 1 mM GABA. Membranes were collected on Whatman/GF-C  
19 glass filter papers using a Brandel cell harvester (Gaithersburg, MD). To perform [<sup>3</sup>H]muscimol binding  
20 isotherms, 100 µg/ml aliquots of membrane protein were incubated with 0.3 nM–1 µM [<sup>3</sup>H]muscimol, with  
21 specific activity reduced to 2 Ci/mmol, for 1 h on ice in the dark. The membranes were collected on  
22 Whatman/GF-B glass filter paper using a vacuum manifold. For the [<sup>3</sup>H]muscimol binding competition,  
23 neurosteroids in the presence of competitors (0.3 µM 3 $\alpha$ 5 $\alpha$ P or 3 µM KK148 vs. 30 µM KK150) or the  
24 same volume of dimethyl sulfoxide (DMSO) were added to the membrane proteins and incubated with 3  
25 nM [<sup>3</sup>H]muscimol on ice for 1 h. Time courses of neurosteroid [<sup>3</sup>H]muscimol binding enhancement were  
26 examined by adding 10 µM of neurosteroids (3 $\alpha$ 5 $\alpha$ P, 3 $\beta$ 5 $\alpha$ P) to membranes that had been fully equilibrated

1 with 3 nM [<sup>3</sup>H]muscimol for 1 h on ice and binding was measured as a function of time at 1, 3, 10, 30, 60  
2 min. The membranes were collected on Whatman/GF-B glass filter papers using vacuum manifold.  
3 Radioactivity bound to the filters was measured by liquid scintillation spectrometry using Bio-Safe II  
4 (Research Products International Corporation).

5

### 6 ***Radioligand binding to intact cells***

7 HEK cells were harvested by gently washing dishes with buffer containing 10 mM sodium phosphate  
8 (pH 7.5), 150 mM sodium chloride twice. The cells were collected by centrifugation at 500 g at 4 °C for 5  
9 min, and resuspended in isotonic (10 mM sodium phosphate, 150 mM sodium chloride, pH 7.5) or  
10 hypotonic (10 mM sodium phosphate, pH 7.5) buffer to prepare two different conditions for radioligand  
11 binding to intact cells [isotonic buffer for cell surface receptors; hypotonic buffer for total receptors (cell  
12 surface receptors + intracellular receptors)]. The cells were incubated on ice for 2 h, after which the sodium  
13 chloride concentration was adjusted to be isotonic before the radioligand binding procedure. HEK cells  
14 were aliquoted to assay tubes (20 samples/150 mm dish) in a total volume of 1 ml, and incubated with 3  
15 nM [<sup>3</sup>H]muscimol and 10 μM KK148 for 1 h on ice in the dark. Nonspecific binding was determined by  
16 binding in the presence of 1 mM GABA. The membranes were collected on Whatman/GF-B glass filter  
17 papers using vacuum manifold. Radioactivity bound to the filters was measured by liquid scintillation  
18 spectrometry using Bio-Safe II.

19

### 20 ***Receptor expression in *Xenopus laevis* oocytes and electrophysiological recordings***

21 The wild-type and mutant  $\alpha_1\beta_3$  GABA<sub>A</sub>R were expressed in oocytes from the African clawed frog  
22 (*Xenopus laevis*). Frogs were purchased from Xenopus 1 (Dexter, MI), and housed and cared for in a  
23 Washington University Animal Care Facility under the supervision of the Washington University Division  
24 of Comparative Medicine. Harvesting of oocytes was conducted under the Guide for the Care and Use of  
25 Laboratory Animals as adopted and promulgated by the National Institutes of Health. The animal protocol  
26 (No. 20180191) was approved by the Animal Studies Committee of Washington University in St. Louis.

1 The oocytes were injected with a total of 12 ng cRNA. The ratio of cRNAs was 5:1 ratio ( $\alpha_1:\beta_3$ ) to minimize  
2 the expression of  $\beta_3$  homomeric receptors. Following injection, the oocytes were incubated in ND96 (96  
3 mM NaCl, 2 mM KCl, 1.8 mM  $\text{CaCl}_2$ , 1 mM  $\text{MgCl}_2$ , 5 mM HEPES; pH 7.4) with supplements (2.5 mM  
4 Na pyruvate, 100 U/ml penicillin, 100  $\mu\text{g/ml}$  streptomycin and 50  $\mu\text{g/ml}$  gentamycin) at 16 °C for 2 days  
5 prior to conducting electrophysiological recordings. The electrophysiological recordings were conducted  
6 at room temperature using standard two-electrode voltage clamp. The oocytes were clamped at -60 mV.  
7 The chamber (RC-1Z, Warner Instruments, Hamden, CT) was perfused with ND96 at 5-8 ml/min. Solutions  
8 were gravity-applied from 30 ml glass syringes with glass luer slips via Teflon tubing. The current responses  
9 were amplified with an OC-725C amplifier (Warner Instruments, Hamden, CT), digitized with a Digidata  
10 1200 series digitizer (Molecular Devices), and stored using pClamp (Molecular Devices). Current traces  
11 were analyzed with Clampfit (Molecular Devices). The stock solution of GABA was made in ND96 at 500  
12 mM, stored in aliquots at -20 °C, and diluted on the day of experiment. The stock solution of muscimol was  
13 made at 20 mM in ND96 and stored at 4 °C. The steroids were dissolved in DMSO at 10-20 mM and stored  
14 at room temperature.

15

### 16 ***Electrophysiological data analysis and simulations***

17 The raw amplitudes of the current traces were converted to units of open probability through comparison  
18 to the peak response to 1 mM GABA + 50  $\mu\text{M}$  propofol, that was considered to have a peak  $P_{\text{open}}$   
19 indistinguishable from 1 (11). The level of constitutive activity in the absence of any applied agonist was  
20 considered negligible and not included in this calculation. The converted current traces were analyzed in  
21 the framework of the three-state Resting-Open-Desensitized activation model (44,45). The model enables  
22 analysis and prediction of peak responses using four parameters that characterize the extent of constitutive  
23 activity (termed L;  $L = \text{Resting/Open}$ ), affinity of the resting receptor to agonist ( $K_C$ ), affinity of the open  
24 receptor to agonist ( $K_O$ ), and the number of agonist binding sites (N). Analysis and prediction of steady-  
25 state responses requires an additional parameter, termed Q, that describes the equilibrium between open  
26 and desensitized receptors ( $Q = \text{Open/Desensitized}$ ).

1 The  $P_{\text{open}}$  of the peak response is expressed as:

2

$$3 \quad P_{\text{open,peak}} = \frac{1}{1 + L\Gamma}$$

4

5 and the  $P_{\text{open}}$  of the steady-state response as:

6

$$7 \quad P_{\text{open,steady-state}} = \frac{1}{1 + \frac{1}{Q} + L\Gamma}$$

8

9

10 where

11

$$12 \quad \Gamma = \left[ \frac{(1 + [X]/K_C)}{(1 + [X]/K_O)} \right]^N$$

13

14

15  $[X]$  is the concentration of agonist present, and other terms are as described above. In practice, the value

16 of  $L\Gamma$  was calculated using the experimentally-determined  $P_{\text{open}}$  of the peak response, and then used as a

17 fixed value in estimating  $Q$  from  $P_{\text{open,steady-state}}$ .

18 The  $P_{\text{desensitized}}$  was calculated using:

19

$$20 \quad P_{\text{desensitized}} = \frac{1}{1 + Q + QL\Gamma}$$

21

22

23 The effect of  $3\beta 5\alpha P$  on 1 mM GABA-elicited steady-state current was expressed through a change in

24 the value of  $Q$ . The modified  $Q$  (termed  $Q^*$ ) was then used to predict changes in  $P_{\text{open}}$  and  $P_{\text{desensitized}}$  at low

25 [GABA].

26

## 1 ***Docking simulations***

2 A docking template of the  $\alpha_1\beta_3$  GABA<sub>A</sub>R was developed using the crystal structure of the human  $\beta_3$   
3 homopentamer (PDB ID: 4COF) (67). In this structure, the cytoplasmic loop was replaced with the  
4 sequence SQPARAA (68). The pentamer subunits were organized as A  $\alpha_1$ , B  $\beta_3$ , C  $\alpha_1$ , D  $\beta_3$ , E  $\beta_3$ . The  $\alpha_1$   
5 sequence was aligned to the  $\beta_3$  sequence using the program MUSCLE (69). The pentameric alignment was  
6 then used as input for the program Modeller (70), using 4COF as the template; a total of 25 models were  
7 generated. The best model as evaluated by the DOPE score (71) was then submitted to the H++ server  
8 (<http://biophysics.cs.vt.edu>) to determine charges and optimize hydrogen bonding. The optimized structure  
9 was then submitted to the PPM server ([https://opm.phar.umich.edu/ppm\\_server](https://opm.phar.umich.edu/ppm_server)) for orientation into a lipid  
10 membrane. The correctly oriented receptor was then submitted to the CHARMM-GUI Membrane Builder  
11 server (<http://www.charmm-gui.org>) to build the fully solvated, membrane bound system oriented into a 1-  
12 palmitoyl-2-oleoyl-sn-glycero-3-phosphatidylcholine (POPC) bilayer. The system was fully solvated with  
13 40715 TIP3 water molecules and ionic strength set to 0.15 M KCl. The NAMD input files produced by  
14 CHARMM-GUI (72) use a seven-step process of gradually loosening constraints in the simulation prior to  
15 production runs. A 100 ns molecular dynamics trajectory was then obtained using the CHARMM36 force  
16 field and NAMD (72). The resulting trajectory was then processed using the utility mdtraj (73), to extract  
17 a snapshot of the receptor at each nanosecond of time frame. These structures were then mutually aligned  
18 by fitting the alpha carbons, providing a set of 100 mutually aligned structures used for docking studies.  
19 The docking was performed using AutoDock Vina (74) on each of the 100 snapshots in order to capture  
20 receptor flexibility.  $3\alpha_5\alpha_P$  and  $3\beta_5\alpha_P$  were prepared by converting the sdf file from PubChem into a PDB  
21 file using Open Babel (75), and Gasteiger charges and free torsion angles were determined by AutoDock  
22 Tools. Docking grid boxes were built for the  $\beta_3$ - $\alpha_1$  intersubunit, and the  $\alpha_1$  and  $\beta_3$  intrasubunit sites with  
23 dimensions of  $15 \times 15 \times 15$  Ångströms encompassing each binding pocket. Docking was limited to an  
24 energy range of 3 kcal from the best docking pose and was limited to a total of 20 unique poses. The docking  
25 results for a given site could result in a maximum of 2,000 unique poses (20 poses  $\times$  100 receptor structures);

- 1 these were then clustered geometrically using the program DIVCF (76). The resulting clusters were ranked
- 2 by Vina score and cluster size, and then visually analyzed.
- 3

TABLE AND FIGURES

| <b>3<math>\alpha</math>5<math>\alpha</math>P</b> | <b>EC<sub>50</sub> (<math>\mu</math>M)</b> | <b>Hill slope</b> | <b>E<sub>max</sub> (% of control)</b> | <b>n</b> |
|--------------------------------------------------|--------------------------------------------|-------------------|---------------------------------------|----------|
| WT $\alpha_1\beta_3$                             | 0.24 $\pm$ 0.04                            | 1.10 $\pm$ 0.14   | 374.1 $\pm$ 11.1                      | 6        |
| $\alpha_1$ (Q242L) $\beta_3$                     | **2.66 $\pm$ 0.51                          | 1.16 $\pm$ 0.37   | **159.8 $\pm$ 10.9                    | 6        |
| $\alpha_1$ (N408A/Y411F) $\beta_3$               | **2.30 $\pm$ 0.48                          | 0.87 $\pm$ 0.44   | **146.0 $\pm$ 9.3                     | 6        |
| $\alpha_1\beta_3$ (Y284F)                        | 0.19 $\pm$ 0.04                            | 0.87 $\pm$ 0.16   | 342.3 $\pm$ 13.9                      | 6        |
| $\alpha_1$ (Q242L/N408A/Y411F) $\beta_3$         | -                                          | -                 | **105.9 $\pm$ 7.3                     | 6        |
| <b>3<math>\beta</math>5<math>\alpha</math>P</b>  |                                            |                   |                                       |          |
| WT $\alpha_1\beta_3$                             | 0.25 $\pm$ 0.08                            | 0.84 $\pm$ 0.23   | 195.1 $\pm$ 6.7                       | 3        |
| $\alpha_1$ (Q242L) $\beta_3$                     | 0.27 $\pm$ 0.09                            | 0.77 $\pm$ 0.21   | 204.3 $\pm$ 4.5                       | 3        |
| $\alpha_1$ (N408A/Y411F) $\beta_3$               | 0.61 $\pm$ 0.26                            | 2.25 $\pm$ 0.92   | **124.3 $\pm$ 2.6                     | 3        |
| $\alpha_1\beta_3$ (Y284F)                        | -                                          | -                 | **148.6 $\pm$ 4.9                     | 3        |
| <b>KK148</b>                                     |                                            |                   |                                       |          |
| WT $\alpha_1\beta_3$                             | 2.40 $\pm$ 0.36                            | 1.36 $\pm$ 0.16   | 431.0 $\pm$ 19.5                      | 6        |
| $\alpha_1$ (Q242L) $\beta_3$                     | 2.20 $\pm$ 0.31                            | 1.24 $\pm$ 0.12   | 434.5 $\pm$ 5.6                       | 6        |
| $\alpha_1$ (N408A/Y411F) $\beta_3$               | 1.63 $\pm$ 0.53                            | 0.73 $\pm$ 0.23   | **161.7 $\pm$ 3.5                     | 6        |
| $\alpha_1$ (V227W) $\beta_3$                     | 1.73 $\pm$ 0.68                            | 0.76 $\pm$ 0.31   | **209.2 $\pm$ 7.4                     | 6        |
| $\alpha_1\beta_3$ (Y284F)                        | 1.79 $\pm$ 0.44                            | 1.35 $\pm$ 0.13   | **357.2 $\pm$ 8.1                     | 6        |
| <b>Etomidate</b>                                 |                                            |                   |                                       |          |
| WT $\alpha_1\beta_3$                             | 7.24 $\pm$ 1.18                            | 1.07 $\pm$ 0.17   | 331.1 $\pm$ 9.9                       | 6        |
| $\alpha_1$ (Q242L) $\beta_3$                     | 7.50 $\pm$ 0.95                            | 1.35 $\pm$ 0.20   | **277.8 $\pm$ 10.9                    | 6        |
| $\alpha_1$ (N408A/Y411F) $\beta_3$               | 9.14 $\pm$ 2.20                            | 1.07 $\pm$ 0.26   | **268.2 $\pm$ 5.9                     | 6        |
| $\alpha_1\beta_3$ (Y284F)                        | 7.71 $\pm$ 1.10                            | 0.90 $\pm$ 0.11   | 303.5 $\pm$ 5.8                       | 6        |
| $\alpha_1\beta_3$ (M286W)                        | *22.5 $\pm$ 6.17                           | 0.50 $\pm$ 0.16   | **128.6 $\pm$ 7.8                     | 6        |

TABLE 1: Effects of mutations on neurosteroid modulation of [<sup>3</sup>H]muscimol binding. EC<sub>50</sub>, Hill slope and maximal effect values [E<sub>max</sub> (% of control): 100% means no effect] for the concentration-response curves in Figures 6B-E. Statistical differences are analyzed using one-way ANOVA with *post hoc* Bonferroni correction (\**P* < 0.05 vs. WT; \*\**P* < 0.01 vs. WT). Data are presented as mean  $\pm$  SEM.

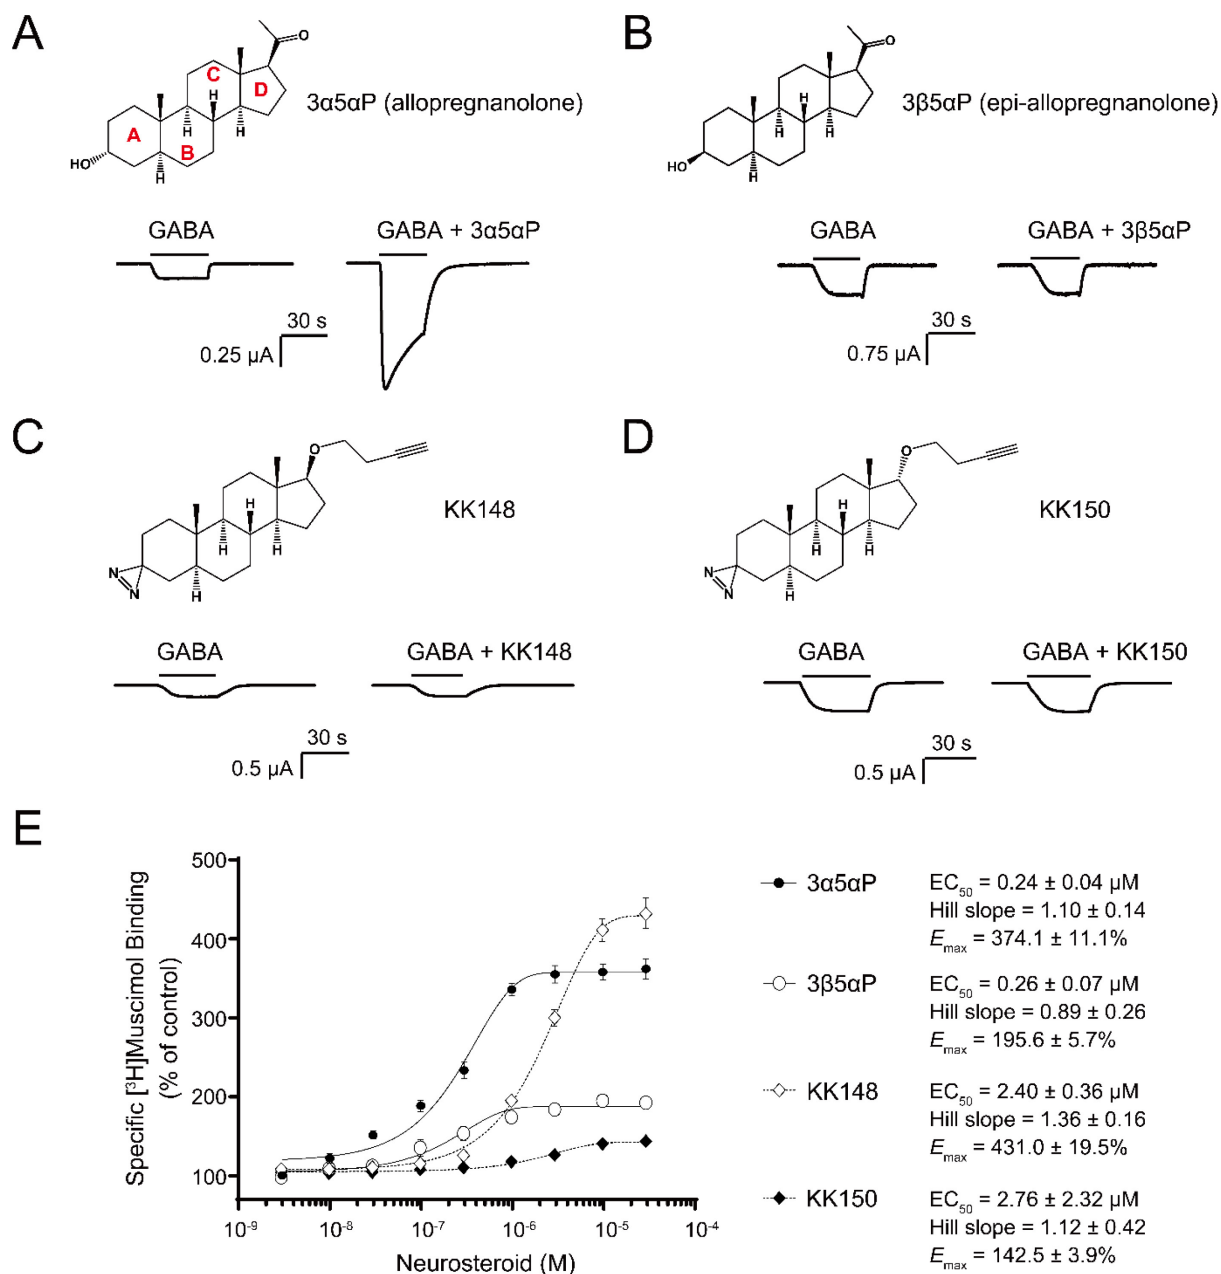

**FIGURE 1: Distinct neurosteroid effects on potentiation of GABA<sub>A</sub>R currents and modulation of [<sup>3</sup>H]muscimol binding.** (A) Structure of allopregnanolone (3α5αP) and sample current traces from α<sub>1</sub>β<sub>3</sub> GABA<sub>A</sub>R activated by 0.3 μM GABA showing potentiation by 10 μM 3α5αP. (B), (C) and (D) Structures of epi-allopregnanolone (3β5αP), neurosteroid analogue photolabeling reagents KK148 and KK150, respectively, and sample current traces from α<sub>1</sub>β<sub>3</sub> GABA<sub>A</sub>R activated by 0.3 μM GABA showing the absence of potentiation by 10 μM neurosteroids. (E) Concentration-response relationship for neurosteroid modulation of [<sup>3</sup>H]muscimol binding to α<sub>1</sub>β<sub>3</sub> GABA<sub>A</sub>R. 3 nM–30 μM neurosteroids modulate [<sup>3</sup>H]muscimol (3 nM) binding in a concentration-dependent manner. Data points, EC<sub>50</sub>, Hill slope and maximal effect value [E<sub>max</sub> (% of control): 100% means no effect] are presented as mean ± SEM (n = 6 for 3α5αP and KK148; n = 3 for 3β5αP and KK150).

**Figure 1—figure supplement 1:** Neurosteroid modulation of muscimol binding to intact cells.



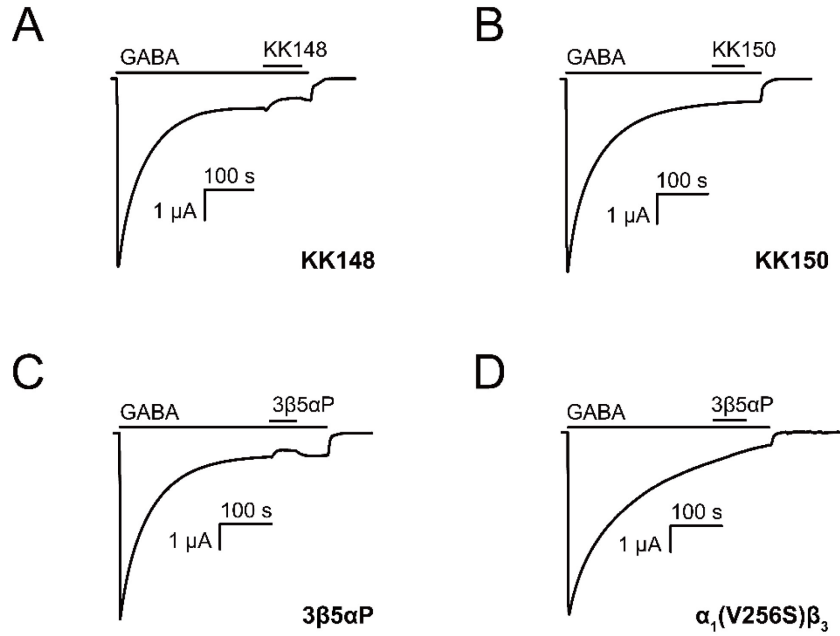

**FIGURE 2: Neurosteroids promote steady-state desensitization of  $\alpha_1\beta_3$  GABA<sub>A</sub>Rs.** Representative traces showing the effects of KK148, KK150 and epi-allopregnanolone (3 $\beta$ 5 $\alpha$ P) on maximal steady-state GABA-elicited currents.  $\alpha_1\beta_3$  GABA<sub>A</sub>Rs expressed in *Xenopus laevis* oocytes were activated with 1 mM GABA to maximally activate GABA<sub>A</sub>R current. (A-C) The effect of KK148 (10  $\mu$ M), KK150 (10  $\mu$ M) and 3 $\beta$ 5 $\alpha$ P (3  $\mu$ M) on steady-state current. (D) The effect of 3 $\beta$ 5 $\alpha$ P (3  $\mu$ M) on steady-state current in  $\alpha_1\beta_3$  GABA<sub>A</sub>Rs containing the  $\alpha_1$ V256S mutation, known to eliminate NS-induced desensitization. The results show that 3 $\beta$ 5 $\alpha$ P and KK148 reduce steady-state currents, consistent with enhanced desensitization, whereas KK150 does not. The effect of 3 $\beta$ 5 $\alpha$ P on steady-state currents is eliminated by the  $\alpha_1$ V256S mutation, consistent with 3 $\beta$ 5 $\alpha$ P enhancing desensitization rather than producing channel block.

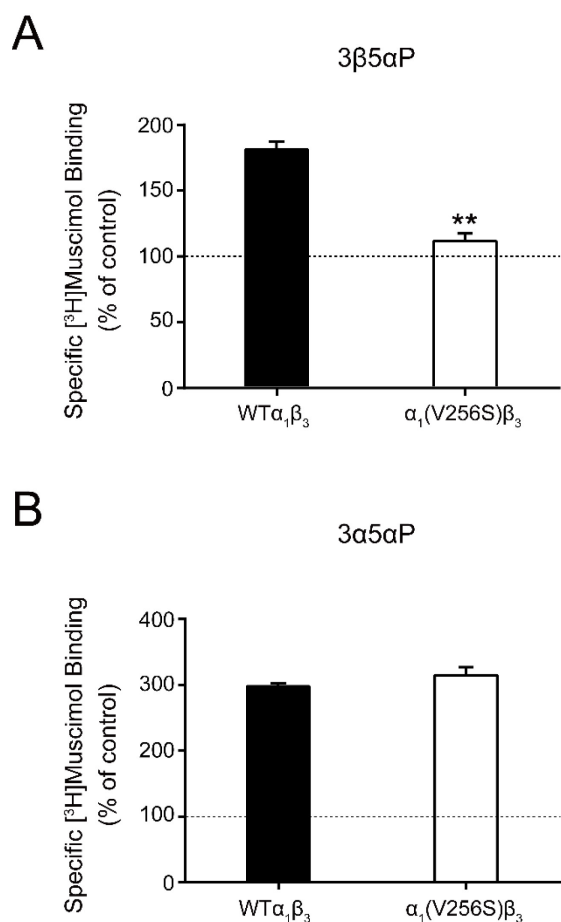

**FIGURE 3: Effect of  $\alpha_1(V256S)\beta_3$  mutation on neurosteroid enhancement of [<sup>3</sup>H]muscimol binding.** (A) Enhancement of specific [<sup>3</sup>H]muscimol (3 nM) binding to  $\alpha_1\beta_3$  GABA<sub>A</sub>R WT by 10  $\mu$ M epi-allopregnanolone (3 $\beta$ 5 $\alpha$ P) is absent in  $\alpha_1(V256S)\beta_3$  GABA<sub>A</sub>R. (B) Enhancement of [<sup>3</sup>H]muscimol binding by 10  $\mu$ M allopregnanolone (3 $\alpha$ 5 $\alpha$ P) is unaffected by the  $\alpha_1V256S$  mutation. These data indicate that 3 $\beta$ 5 $\alpha$ P enhancement of orthosteric ligand binding requires receptor desensitization, whereas 3 $\alpha$ 5 $\alpha$ P does not. ( $n = 6$ ,  $\pm$  SEM). \*\* $P < 0.01$  vs. WT.

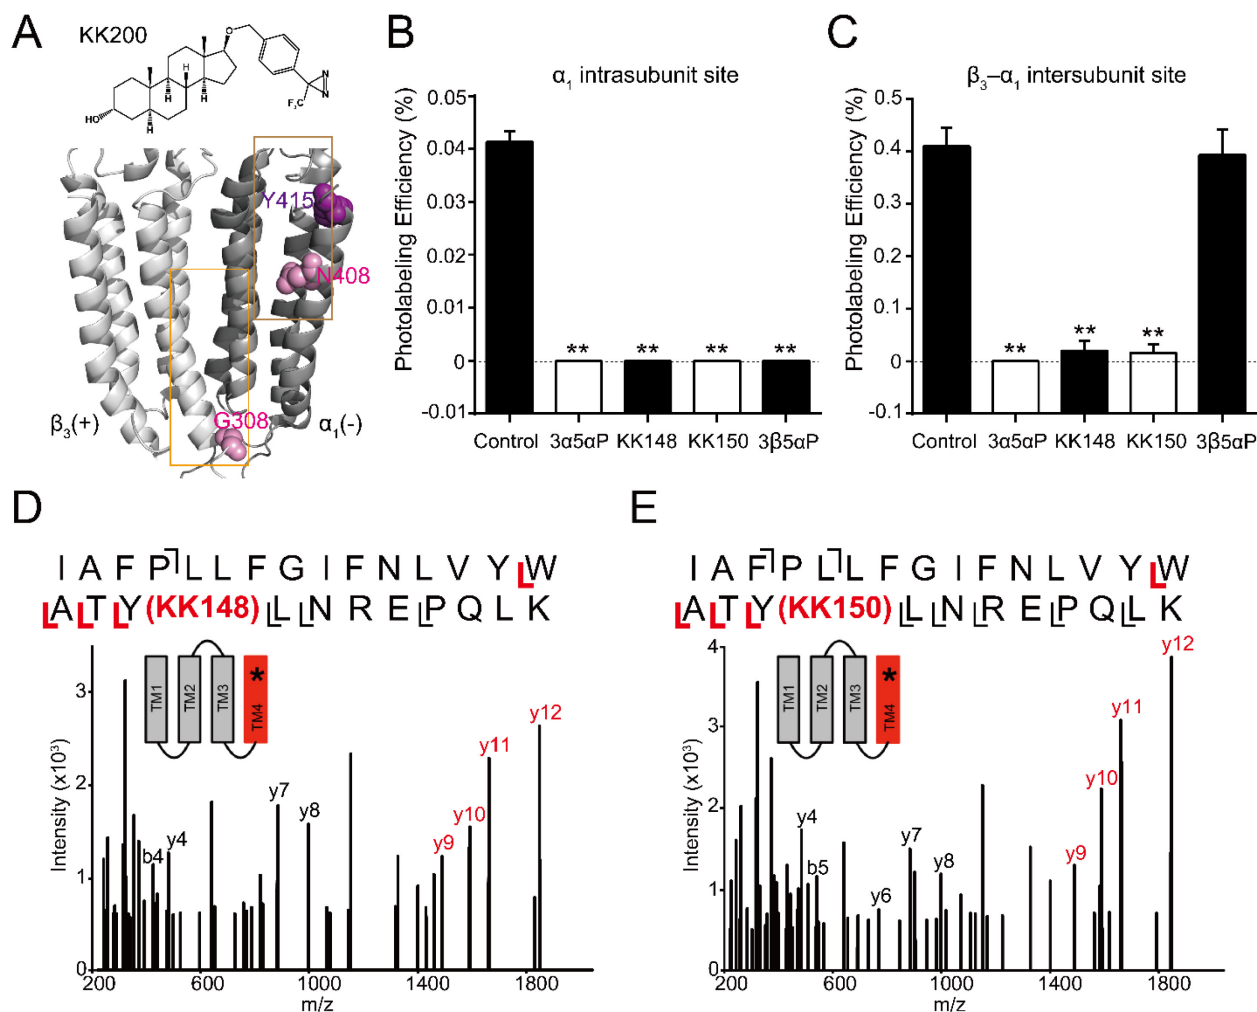

**FIGURE 4: Competitive prevention of neurosteroid photolabeling at an intersubunit and intrasubunit site.** (A) Structures of the neurosteroid photolabeling reagent KK200 and the  $\alpha_1\beta_3$  GABA<sub>A</sub>R-TMDs highlighting the residues G308 in the  $\beta_3(+)$ - $\alpha_1(-)$  intersubunit site and N408 in the  $\alpha_1$  intrasubunit site previously identified by KK200 photolabeling in pink. Shown in purple is Y415 in the  $\alpha_1$  intrasubunit site, which is photolabeled by KK148 and KK150. Adjacent  $\beta_3(+)$  and  $\alpha_1(-)$  subunits are shown and the channel pore is behind the subunits. (B) Photolabeling efficiency of  $\alpha_1$  subunit TM4 ( $\alpha_1$  intrasubunit site) in  $\alpha_1\beta_3$  GABA<sub>A</sub>R by 3  $\mu$ M KK200 in the absence or presence of 30  $\mu$ M allopregnanolone (3 $\alpha$ 5 $\alpha$ P), KK148, KK150, and epi-allopregnanolone (3 $\beta$ 5 $\alpha$ P) ( $n = 3$ ,  $\pm$  SEM). \*\* $P < 0.01$  vs. control. (C) Same as (B) for  $\beta_3$  subunit TM3 [ $\beta_3(+)$ - $\alpha_1(-)$  intersubunit site,  $n = 3$ ,  $\pm$  SEM]. (D) HCD fragmentation spectrum of the  $\alpha_1$  subunit TM4 tryptic peptide photolabeled by 30  $\mu$ M KK148. Red and black indicate fragment ions that do or do not contain KK148, respectively. The schematic highlight in red identifies the TMD being analyzed and the asterisk denotes the approximate location of KK148. (E) Same as (D) photolabeled by 30  $\mu$ M KK150.

**Figure 4—figure supplement 1:** Extracted ion chromatograms of labeled and unlabeled  $\beta_3$  subunit TM4 peptides.

**Figure 4—figure supplement 2:** Fragmentation spectrum of unlabeled  $\alpha_1$  subunit TM4 peptide.

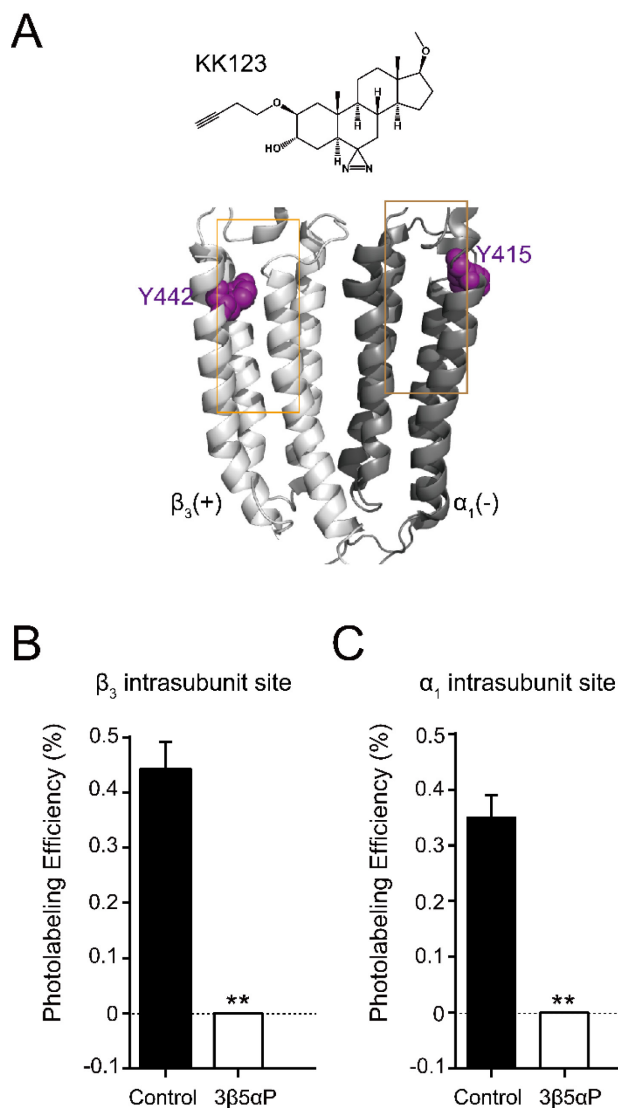

**FIGURE 5: Epi-allopregnanolone prevents neurosteroid photolabeling at the  $\alpha_1$  and  $\beta_3$  intrasubunit sites.** (A) Structures of the neurosteroid photolabeling reagent KK123 and the  $\alpha_1\beta_3$  GABA<sub>A</sub>-R-TMDs highlighting the residues Y442 in the  $\beta_3$  intrasubunit site and Y415 in the  $\alpha_1$  intrasubunit site previously identified by KK123 photolabeling in purple. Adjacent  $\beta_3(+)$  and  $\alpha_1(-)$  subunits are shown and the channel pore is behind the subunits. (B) Photolabeling efficiency of  $\beta_3$  subunit TM4 ( $\beta_3$  intrasubunit site) in  $\alpha_1\beta_3$  GABA<sub>A</sub>R by 3  $\mu$ M KK123 in the absence or presence of 30  $\mu$ M epi-allopregnanolone (3 $\beta$ 5 $\alpha$ P) ( $n = 3$ ,  $\pm$  SEM). \*\* $P < 0.01$  vs. control. (C) Same as (B) for  $\alpha_1$  subunit TM4 ( $\alpha_1$  intrasubunit site,  $n = 3$ ,  $\pm$  SEM).

A

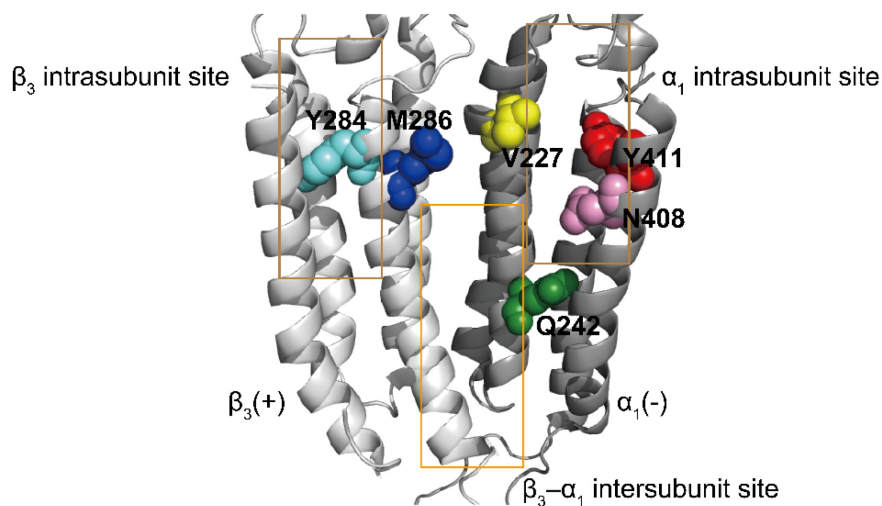

B

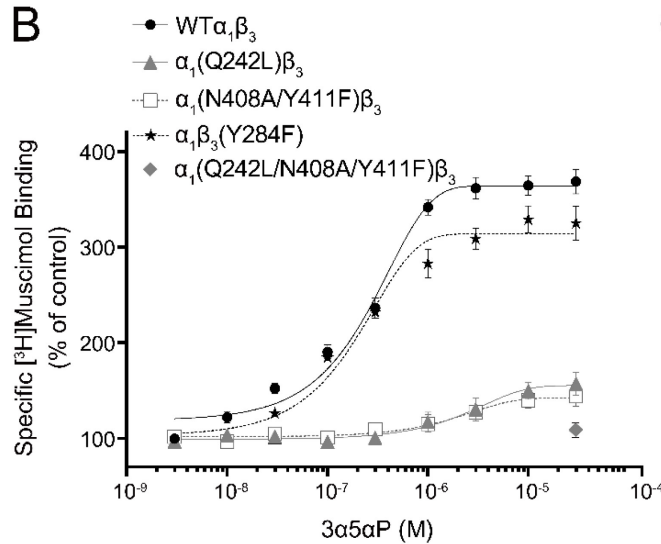

C

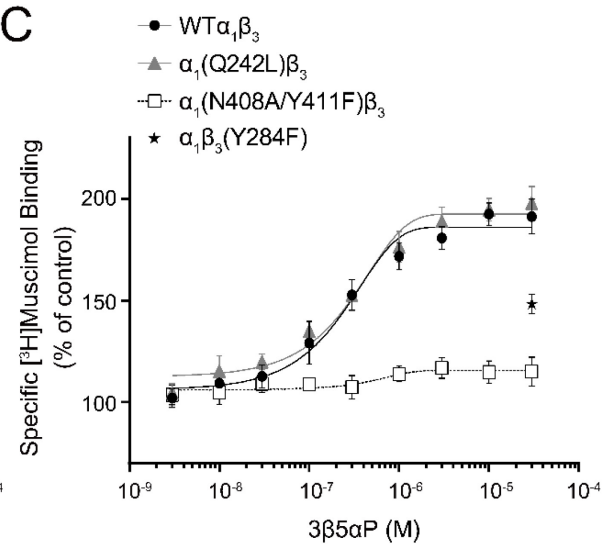

D

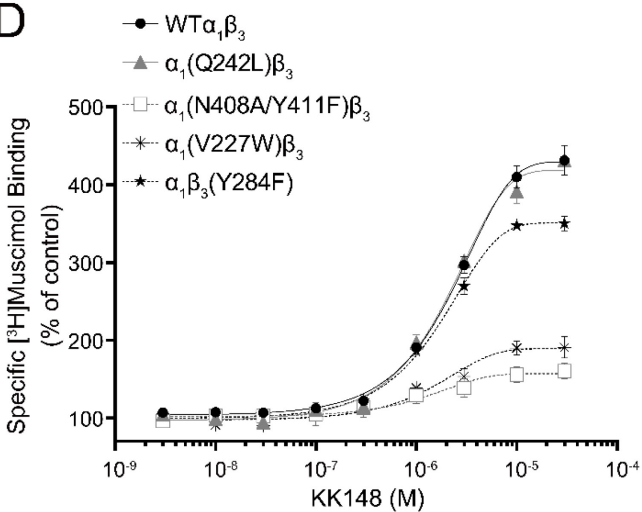

E

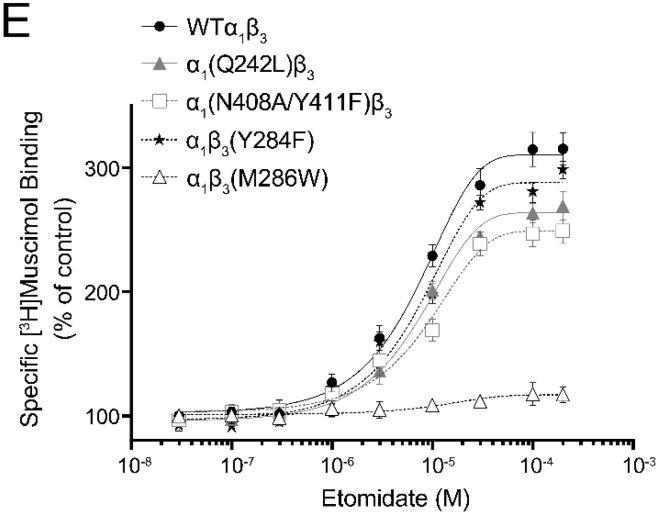

**FIGURE 6: Effect of mutations in  $\alpha_1\beta_3$  GABA<sub>A</sub>R on neurosteroid modulation of [<sup>3</sup>H]muscimol binding.** (A) Structure of the  $\alpha_1\beta_3$  GABA<sub>A</sub>R-TMD highlighting the residues where mutations were made in putative binding sites for neurosteroids (Q242-green for  $\beta_3$ - $\alpha_1$  intersubunit site; V227-yellow, N408-pink and Y411-red for  $\alpha_1$  intrasubunit site; Y284-cyan for  $\beta_3$  intrasubunit site) and M286-blue for etomidate. Adjacent  $\beta_3(+)$  and  $\alpha_1(-)$  subunits are shown and the channel pore is behind the subunits. (B) Concentration-response relationship for the effect of 3 nM–30  $\mu$ M allopregnanolone (3 $\alpha$ 5 $\alpha$ P) on [<sup>3</sup>H]muscimol (3 nM) binding to  $\alpha_1\beta_3$  GABA<sub>A</sub>R WT and indicated mutants. Data points represent mean  $\pm$  SEM ( $n = 6$ ). (C), (D) and (E) Same as (B) for 3 nM–30  $\mu$ M epi-allopregnanolone (3 $\beta$ 5 $\alpha$ P) ( $n = 3$ ), KK148 ( $n = 6$ ) and 30 nM–200  $\mu$ M etomidate ( $n = 6$ ), respectively. The data for WT in panels 6B and 6D is a replot of the same data shown in Figure 1E.

**Figure 6–figure supplement 1:** Neurosteroid effect on [<sup>3</sup>H]muscimol binding isotherms in  $\alpha_1\beta_3$  WT and  $\alpha_1$ (N408A/Y411F) $\beta_3$  GABA<sub>A</sub>Rs.

**Figure 6–figure supplement 2:** Properties of [<sup>3</sup>H]muscimol saturation binding curves in the  $\alpha_1\beta_3$  GABA<sub>A</sub>R WT and  $\alpha_1$ (N408A/Y411F) $\beta_3$  mutant.

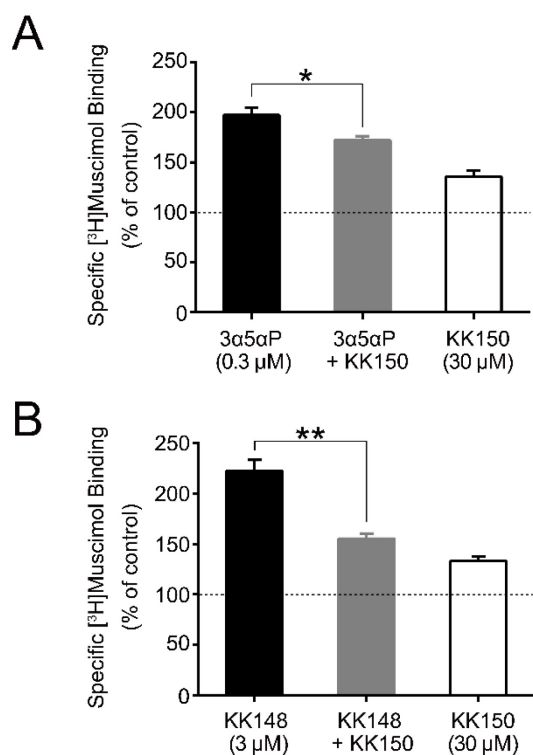

**FIGURE 7: KK150 prevents neurosteroid-induced muscimol binding enhancement.** (A) Enhancement of specific [<sup>3</sup>H]muscimol (3 nM) binding to  $\alpha_1\beta_3$  GABA<sub>A</sub>R by 0.3  $\mu$ M allopregnanolone (3 $\alpha$ 5 $\alpha$ P) in the absence (black bar) or presence (grey bar) of 30  $\mu$ M KK150 and KK150 alone (white bar) ( $n = 8, \pm$  SEM). \* $P < 0.05$  vs. 0.3  $\mu$ M 3 $\alpha$ 5 $\alpha$ P alone. (B) Same as (A) for 3  $\mu$ M KK148 ( $n = 8, \pm$  SEM). \*\* $P < 0.01$  vs. 3  $\mu$ M KK148 alone.

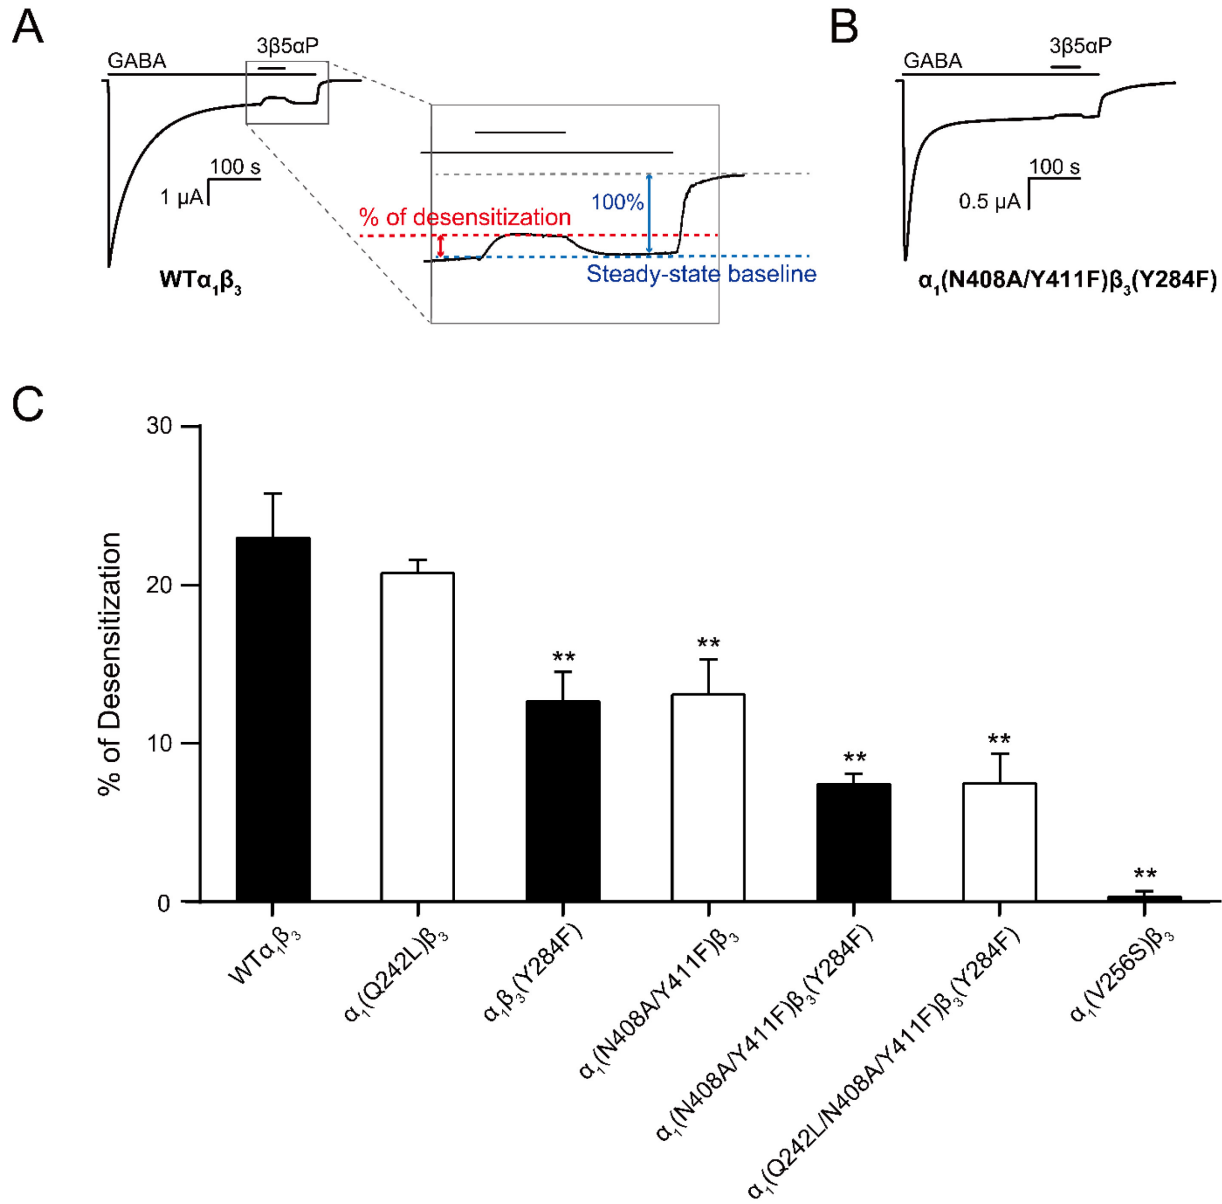

**FIGURE 8: Mutations in intrasubunit sites prevent desensitization by epi-allopregnanolone.** (A) Sample current trace showing the effect of 3 μM epi-allopregnanolone (3β5αP) on α<sub>1</sub>β<sub>3</sub> GABA<sub>A</sub>R activated by 1 mM GABA. A zoomed-in box shows neurosteroid-induced desensitization of the steady-state GABA current. (B) Same as (A) for α<sub>1</sub>(N408A/Y411F)β<sub>3</sub>(Y284F) GABA<sub>A</sub>R. (C) Percent desensitization of the steady-state α<sub>1</sub>β<sub>3</sub> GABA<sub>A</sub>R currents (WT and mutants) by 3 μM 3β5αP during continuous application of 1 mM GABA. (*n* = 5, ± SEM). \*\**P* < 0.01 vs. WT.



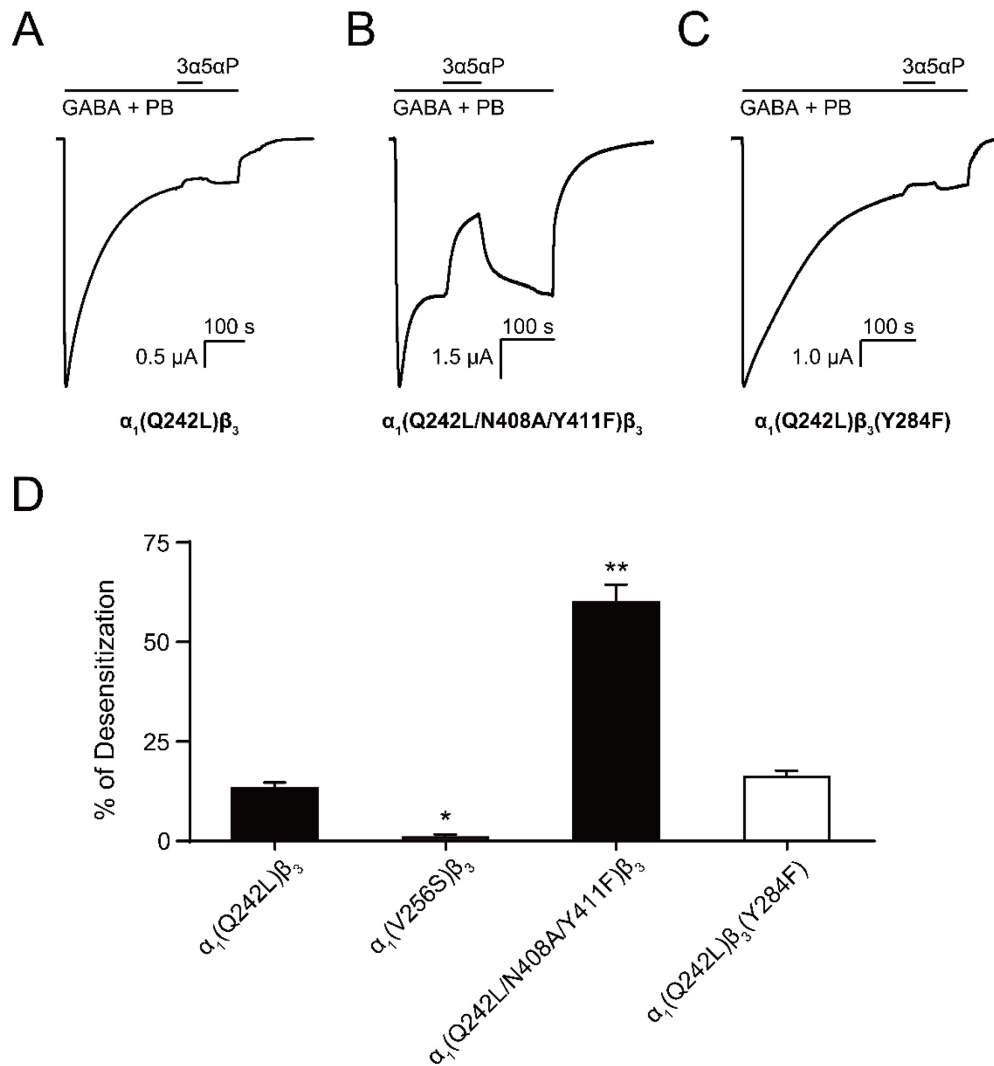

**FIGURE 9: Allopregnanolone desensitizes GABA<sub>A</sub>R currents via binding to the  $\beta_3$  intrasubunit site.** (A) Sample current trace showing the effect of 3  $\mu$ M allopregnanolone (3 $\alpha$ 5 $\alpha$ P) on  $\alpha_1(Q242L)\beta_3$  GABA<sub>A</sub>R activated by 1 mM GABA co-applied with 40  $\mu$ M pentobarbital (PB). (B), (C) Same as (A) for  $\alpha_1(Q242L/N408A/Y411F)\beta_3$  GABA<sub>A</sub>R and  $\alpha_1(Q242L)\beta_3(Y284F)$  GABA<sub>A</sub>R, respectively. (D) Percent desensitization of the steady-state currents elicited by 1 mM GABA with 40  $\mu$ M PB in  $\alpha_1\beta_3$  GABA<sub>A</sub>R with specified mutations [ $n = 4$  for  $\alpha_1(V256S)\beta_3$ ;  $n = 5$  for others,  $\pm$  SEM]. \* $P < 0.05$ ; \*\* $P < 0.01$  vs.  $\alpha_1(Q242L)\beta_3$ , respectively.

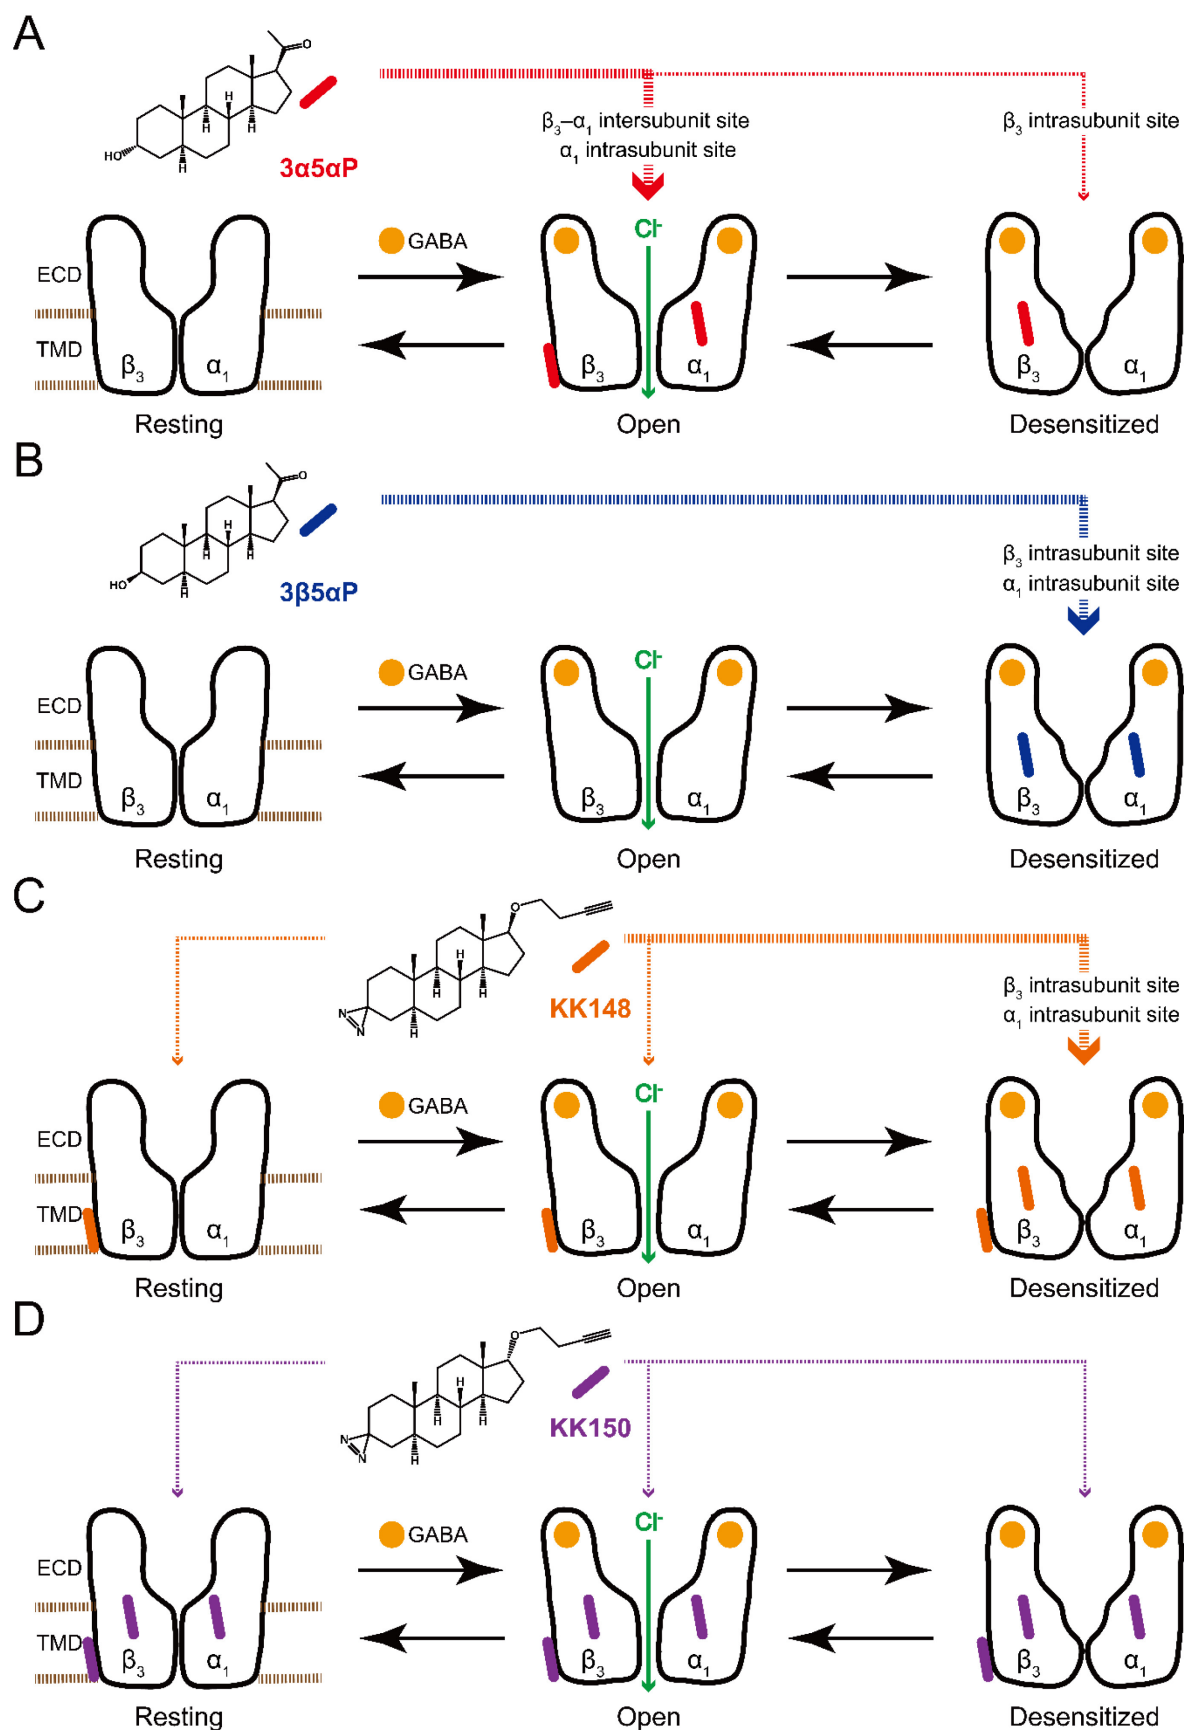

**FIGURE 10: Neurosteroids preferentially stabilize GABA<sub>A</sub>R in different states.** (A) Model showing three fundamental conformational states that depict the channel function in the GABA<sub>A</sub>R: a resting state; an open state; and a desensitized state. Agonist (GABA: ●) binding shifts the equilibrium towards high-affinity states (open and desensitized). Allopregnanolone (3 $\alpha$ 5 $\alpha$ P: ●) allosterically stabilizes the high-affinity states (an open state through the  $\beta_3$ - $\alpha_1$  intersubunit and the  $\alpha_1$  intrasubunit sites; a desensitized state through the  $\beta_3$  intrasubunit site). The width of red arrows indicates relative affinities of 3 $\alpha$ 5 $\alpha$ P for the open or desensitized state of the receptor. (B) Same as (A) for epi-allopregnanolone (3 $\beta$ 5 $\alpha$ P: ●). 3 $\beta$ 5 $\alpha$ P stabilizes a desensitized state through the  $\beta_3$  and  $\alpha_1$  intrasubunit sites. (C) Same as (A) for KK148 (●). KK148 allosterically stabilizes a desensitized state through the  $\beta_3$  and  $\alpha_1$  intrasubunit sites, and equally stabilizes all three states of the receptor through the  $\beta_3$ - $\alpha_1$  intersubunit site. The width of orange arrows indicates relative affinities of KK148 for each state of the receptor. (D) Same as (A) for KK150 (●). KK150 equally stabilizes all three states of the receptor through the  $\beta_3$  and  $\alpha_1$  intrasubunit sites, and the  $\beta_3$ - $\alpha_1$  intersubunit site.

## REFERENCES

1. Belelli, D., and Lambert, J. J. (2005) Neurosteroids: endogenous regulators of the GABA(A) receptor. *Nat Rev Neurosci* **6**, 565-575
2. Mitchell, E. A., Herd, M. B., Gunn, B. G., Lambert, J. J., and Belelli, D. (2008) Neurosteroid modulation of GABAA receptors: molecular determinants and significance in health and disease. *Neurochem Int* **52**, 588-595
3. Represa, A., and Ben-Ari, Y. (2005) Trophic actions of GABA on neuronal development. *Trends Neurosci* **28**, 278-283
4. Grobin, A. C., Gizerian, S., Lieberman, J. A., and Morrow, A. L. (2006) Perinatal allopregnanolone influences prefrontal cortex structure, connectivity and behavior in adult rats. *Neuroscience* **138**, 809-819
5. Akk, G., Covey, D. F., Evers, A. S., Steinbach, J. H., Zorumski, C. F., and Mennerick, S. (2007) Mechanisms of neurosteroid interactions with GABA(A) receptors. *Pharmacol Ther* **116**, 35-57
6. Reddy, D. S., and Estes, W. A. (2016) Clinical Potential of Neurosteroids for CNS Disorders. *Trends Pharmacol Sci* **37**, 543-561
7. Kharasch, E. D., and Hollmann, M. W. (2015) Steroid Anesthesia Revisited: Again. *Anesth Analg* **120**, 983-984
8. Gunduz-Bruce, H., Silber, C., Kaul, I., Rothschild, A. J., Riesenberger, R., Sankoh, A. J., Li, H., Lasser, R., Zorumski, C. F., Rubinow, D. R., Paul, S. M., Jonas, J., Doherty, J. J., and Kaner, S. J. (2019) Trial of SAGE-217 in Patients with Major Depressive Disorder. *N Engl J Med* **381**, 903-911
9. Zorumski, C. F., Paul, S. M., Covey, D. F., and Mennerick, S. (2019) Neurosteroids as novel antidepressants and anxiolytics: GABA-A receptors and beyond. *Neurobiol Stress* **11**, 100196
10. Akk, G., Covey, D. F., Evers, A. S., Mennerick, S., Zorumski, C. F., and Steinbach, J. H. (2010) Kinetic and structural determinants for GABA-A receptor potentiation by neuroactive steroids. *Curr Neuropharmacol* **8**, 18-25
11. Chen, Z. W., Bracamontes, J. R., Budelier, M. M., Germann, A. L., Shin, D. J., Kathiresan, K., Qian, M. X., Manion, B., Cheng, W. W. L., Reichert, D. E., Akk, G., Covey, D. F., and Evers, A. S. (2019) Multiple functional neurosteroid binding sites on GABAA receptors. *PLoS Biol* **17**, e3000157
12. Olsen, R. W. (2018) GABAA receptor: Positive and negative allosteric modulators. *Neuropharmacology* **136**, 10-22
13. Akk, G., Bracamontes, J., and Steinbach, J. H. (2001) Pregnenolone sulfate block of GABA(A) receptors: mechanism and involvement of a residue in the M2 region of the alpha subunit. *J Physiol* **532**, 673-684
14. Wang, M., He, Y., Eisenman, L. N., Fields, C., Zeng, C. M., Mathews, J., Benz, A., Fu, T., Zorumski, E., Steinbach, J. H., Covey, D. F., Zorumski, C. F., and Mennerick, S. (2002) 3beta-hydroxypregnane steroids are pregnenolone sulfate-like GABA(A) receptor antagonists. *J Neurosci* **22**, 3366-3375
15. Shen, W., Mennerick, S., Covey, D. F., and Zorumski, C. F. (2000) Pregnenolone sulfate modulates inhibitory synaptic transmission by enhancing GABA(A) receptor desensitization. *J Neurosci* **20**, 3571-3579
16. Lundgren, P., Stromberg, J., Backstrom, T., and Wang, M. (2003) Allopregnanolone-stimulated GABA-mediated chloride ion flux is inhibited by 3beta-hydroxy-5alpha-pregnan-20-one (isoallopregnanolone). *Brain Res* **982**, 45-53
17. Seljeset, S., Bright, D. P., Thomas, P., and Smart, T. G. (2018) Probing GABA<sub>A</sub> receptors with inhibitory neurosteroids. *Neuropharmacology* **136**, 23-36
18. Harrison, N. L., Majewska, M. D., Harrington, J. W., and Barker, J. L. (1987) Structure-activity relationships for steroid interaction with the gamma-aminobutyric acidA receptor complex. *J Pharmacol Exp Ther* **241**, 346-353

19. Sigel, E., and Steinmann, M. E. (2012) Structure, function, and modulation of GABA(A) receptors. *J Biol Chem* **287**, 40224-40231
20. Sieghart, W. (2015) Allosteric modulation of GABAA receptors via multiple drug-binding sites. *Adv Pharmacol* **72**, 53-96
21. Olsen, R. W., and Sieghart, W. (2008) International Union of Pharmacology. LXX. Subtypes of gamma-aminobutyric acid(A) receptors: classification on the basis of subunit composition, pharmacology, and function. Update. *Pharmacol Rev* **60**, 243-260
22. Lavery, D., Desai, R., Uchanski, T., Masiulis, S., Stec, W. J., Malinauskas, T., Zivanov, J., Pardon, E., Steyaert, J., Miller, K. W., and Aricescu, A. R. (2019) Cryo-EM structure of the human alpha1beta3gamma2 GABAA receptor in a lipid bilayer. *Nature* **565**, 516-520
23. Miller, P. S., Scott, S., Masiulis, S., De Colibus, L., Pardon, E., Steyaert, J., and Aricescu, A. R. (2017) Structural basis for GABA<sub>A</sub> receptor potentiation by neurosteroids. *Nat Struct Mol Biol* **24**, 986-992
24. Lavery, D., Thomas, P., Field, M., Andersen, O. J., Gold, M. G., Biggin, P. C., Gielen, M., and Smart, T. G. (2017) Crystal structures of a GABA<sub>A</sub>-receptor chimera reveal new endogenous neurosteroid-binding sites. *Nat Struct Mol Biol* **24**, 977-985
25. Hosie, A. M., Wilkins, M. E., da Silva, H. M., and Smart, T. G. (2006) Endogenous neurosteroids regulate GABA<sub>A</sub> receptors through two discrete transmembrane sites. *Nature* **444**, 486-489
26. Hosie, A. M., Clarke, L., da Silva, H., and Smart, T. G. (2009) Conserved site for neurosteroid modulation of GABA A receptors. *Neuropharmacology* **56**, 149-154
27. Chen, Q., Wells, M. M., Arjunan, P., Tillman, T. S., Cohen, A. E., Xu, Y., and Tang, P. (2018) Structural basis of neurosteroid anesthetic action on GABAA receptors. *Nat Commun* **9**, 3972
28. Sugasawa, Y., Bracamontes, J. R., Krishnan, K., Covey, D. F., Reichert, D. E., Akk, G., Chen, Q., Tang, P., Evers, A. S., and Cheng, W. W. L. (2019) The molecular determinants of neurosteroid binding in the GABA(A) receptor. *J Steroid Biochem Mol Biol* **192**, 105383
29. Akk, G., Li, P., Bracamontes, J., Reichert, D. E., Covey, D. F., and Steinbach, J. H. (2008) Mutations of the GABA-A receptor alpha1 subunit M1 domain reveal unexpected complexity for modulation by neuroactive steroids. *Mol Pharmacol* **74**, 614-627
30. Akk, G., Bracamontes, J. R., Covey, D. F., Evers, A., Dao, T., and Steinbach, J. H. (2004) Neuroactive steroids have multiple actions to potentiate GABA<sub>A</sub> receptors. *J Physiol* **558**, 59-74
31. Evers, A. S., Chen, Z. W., Manion, B. D., Han, M., Jiang, X., Darbandi-Tonkabon, R., Kable, T., Bracamontes, J., Zorumski, C. F., Mennerick, S., Steinbach, J. H., and Covey, D. F. (2010) A synthetic 18-norsteroid distinguishes between two neuroactive steroid binding sites on GABA<sub>A</sub> receptors. *J Pharmacol Exp Ther* **333**, 404-413
32. Park-Chung, M., Malayev, A., Purdy, R. H., Gibbs, T. T., and Farb, D. H. (1999) Sulfated and unsulfated steroids modulate gamma-aminobutyric acidA receptor function through distinct sites. *Brain Res* **830**, 72-87
33. Jiang, X., Shu, H. J., Krishnan, K., Qian, M., Taylor, A. A., Covey, D. F., Zorumski, C. F., and Mennerick, S. (2016) A clickable neurosteroid photolabel reveals selective Golgi compartmentalization with preferential impact on proximal inhibition. *Neuropharmacology* **108**, 193-206
34. Budelier, M. M., Cheng, W. W. L., Bergdoll, L., Chen, Z. W., Janetka, J. W., Abramson, J., Krishnan, K., Mydock-McGrane, L., Covey, D. F., Whitelegge, J. P., and Evers, A. S. (2017) Photoaffinity labeling with cholesterol analogues precisely maps a cholesterol-binding site in voltage-dependent anion channel-1. *J Biol Chem* **292**, 9294-9304
35. Budelier, M. M., Cheng, W. W. L., Chen, Z. W., Bracamontes, J. R., Sugasawa, Y., Krishnan, K., Mydock-McGrane, L., Covey, D. F., and Evers, A. S. (2018) Common binding sites for cholesterol and neurosteroids on a pentameric ligand-gated ion channel. *Biochim Biophys Acta Mol Cell Biol Lipids* **1864**, 128-136
36. Cheng, W. W. L., Chen, Z. W., Bracamontes, J. R., Budelier, M. M., Krishnan, K., Shin, D. J., Wang, C., Jiang, X., Covey, D. F., Akk, G., and Evers, A. S. (2018) Mapping two neurosteroid-

- modulatory sites in the prototypic pentameric ligand-gated ion channel GLIC. *J Biol Chem* **293**, 3013-3027
37. Chang, Y., Ghansah, E., Chen, Y., Ye, J., and Weiss, D. S. (2002) Desensitization mechanism of GABA receptors revealed by single oocyte binding and receptor function. *J Neurosci* **22**, 7982-7990
  38. Abramian, A. M., Comenencia-Ortiz, E., Modgil, A., Vien, T. N., Nakamura, Y., Moore, Y. E., Maguire, J. L., Terunuma, M., Davies, P. A., and Moss, S. J. (2014) Neurosteroids promote phosphorylation and membrane insertion of extrasynaptic GABA<sub>A</sub> receptors. *Proc Natl Acad Sci U S A* **111**, 7132-7137
  39. Comenencia-Ortiz, E., Moss, S. J., and Davies, P. A. (2014) Phosphorylation of GABA<sub>A</sub> receptors influences receptor trafficking and neurosteroid actions. *Psychopharmacology (Berl)* **231**, 3453-3465
  40. Smith, S. S., Shen, H., Gong, Q. H., and Zhou, X. (2007) Neurosteroid regulation of GABA(A) receptors: Focus on the alpha4 and delta subunits. *Pharmacol Ther* **116**, 58-76
  41. Vauquelin, G., Van Liefde, I., and Swinney, D. C. (2015) Radioligand binding to intact cells as a tool for extended drug screening in a representative physiological context. *Drug Discov Today Technol* **17**, 28-34
  42. Bylund, D. B., Deupree, J. D., and Toews, M. L. (2004) Radioligand-binding methods for membrane preparations and intact cells. *Methods Mol Biol* **259**, 1-28
  43. Bylund, D. B., and Toews, M. L. (1993) Radioligand binding methods: practical guide and tips. *Am J Physiol* **265**, L421-429
  44. Germann, A. L., Pierce, S. R., Burbridge, A. B., Steinbach, J. H., and Akk, G. (2019) Steady-State Activation and Modulation of the Concatemeric alpha 1 beta 2 gamma 2L GABA(A) Receptor. *Molecular Pharmacology* **96**, 320-329
  45. Germann, A. L., Pierce, S. R., Senneff, T. C., Burbridge, A. B., Steinbach, J. H., and Akk, G. (2019) Steady-state activation and modulation of the synaptic-type alpha1beta2gamma2L GABA<sub>A</sub> receptor by combinations of physiological and clinical ligands. *Physiol Rep* **7**, e14230
  46. Eaton, M. M., Germann, A. L., Arora, R., Cao, L. Q., Gao, X., Shin, D. J., Wu, A., Chiara, D. C., Cohen, J. B., Steinbach, J. H., Evers, A. S., and Akk, G. (2016) Multiple Non-Equivalent Interfaces Mediate Direct Activation of GABA<sub>A</sub> Receptors by Propofol. *Curr Neuropharmacol* **14**, 772-780
  47. Das, J. (2011) Aliphatic diazirines as photoaffinity probes for proteins: recent developments. *Chem Rev* **111**, 4405-4417
  48. Li, G. D., Chiara, D. C., Sawyer, G. W., Husain, S. S., Olsen, R. W., and Cohen, J. B. (2006) Identification of a GABA<sub>A</sub> receptor anesthetic binding site at subunit interfaces by photolabeling with an etomidate analog. *J Neurosci* **26**, 11599-11605
  49. Jayakar, S. S., Zhou, X., Chiara, D. C., Jarava-Barrera, C., Savechenkov, P. Y., Bruzik, K. S., Tortosa, M., Miller, K. W., and Cohen, J. B. (2019) Identifying Drugs that Bind Selectively to Intersubunit General Anesthetic Sites in the alpha1beta3gamma2 GABA<sub>A</sub> Transmembrane Domain. *Mol Pharmacol* **95**, 615-628
  50. Stewart, D., Desai, R., Cheng, Q., Liu, A., and Forman, S. A. (2008) Tryptophan mutations at azi-etomidate photo-incorporation sites on alpha1 or beta2 subunits enhance GABA<sub>A</sub> receptor gating and reduce etomidate modulation. *Mol Pharmacol* **74**, 1687-1695
  51. Ziembra, A. M., Szabo, A., Pierce, D. W., Haburcak, M., Stern, A. T., Nourmahnad, A., Halpin, E. S., and Forman, S. A. (2018) Alphaxalone Binds in Inner Transmembrane beta+-alpha- Interfaces of alpha1beta3gamma2 gamma-Aminobutyric Acid Type A Receptors. *Anesthesiology* **128**, 338-351
  52. Steinbach, J. H., and Akk, G. (2001) Modulation of GABA(A) receptor channel gating by pentobarbital. *J Physiol* **537**, 715-733
  53. Bracamontes, J. R., and Steinbach, J. H. (2009) Steroid interaction with a single potentiating site is sufficient to modulate GABA-A receptor function. *Mol Pharmacol* **75**, 973-981



54. Haage, D., and Johansson, S. (1999) Neurosteroid modulation of synaptic and GABA-evoked currents in neurons from the rat medial preoptic nucleus. *J Neurophysiol* **82**, 143-151
55. Zhu, W. J., and Vicini, S. (1997) Neurosteroid prolongs GABAA channel deactivation by altering kinetics of desensitized states. *J Neurosci* **17**, 4022-4031
56. Bianchi, M. T., and Macdonald, R. L. (2003) Neurosteroids shift partial agonist activation of GABA(A) receptor channels from low- to high-efficacy gating patterns. *J Neurosci* **23**, 10934-10943
57. Jones, M. V., and Westbrook, G. L. (1995) Desensitized states prolong GABAA channel responses to brief agonist pulses. *Neuron* **15**, 181-191
58. Lange, Y., and Steck, T. L. (2016) Active membrane cholesterol as a physiological effector. *Chem Phys Lipids* **199**, 74-93
59. Basak, S., Schmandt, N., Gicheru, Y., and Chakrapani, S. (2017) Crystal structure and dynamics of a lipid-induced potential desensitized-state of a pentameric ligand-gated channel. *Elife* **6**
60. Tong, A., Petroff, J. T., 2nd, Hsu, F. F., Schmidpeter, P. A., Nimigeon, C. M., Sharp, L., Brannigan, G., and Cheng, W. W. (2019) Direct binding of phosphatidylglycerol at specific sites modulates desensitization of a ligand-gated ion channel. *Elife* **8**
61. Farrant, M., and Nusser, Z. (2005) Variations on an inhibitory theme: phasic and tonic activation of GABA(A) receptors. *Nat Rev Neurosci* **6**, 215-229
62. Feng, H. J., and Forman, S. A. (2018) Comparison of alphabeta and alphabeta gamma GABAA receptors: Allosteric modulation and identification of subunit arrangement by site-selective general anesthetics. *Pharmacol Res* **133**, 289-300
63. Overstreet, L. S., Jones, M. V., and Westbrook, G. L. (2000) Slow desensitization regulates the availability of synaptic GABA(A) receptors. *J Neurosci* **20**, 7914-7921
64. Harrison, N. L., Vicini, S., and Barker, J. L. (1987) A steroid anesthetic prolongs inhibitory postsynaptic currents in cultured rat hippocampal neurons. *J Neurosci* **7**, 604-609
65. Chakrabarti, S., Qian, M., Krishnan, K., Covey, D. F., Mennerick, S., and Akk, G. (2016) Comparison of Steroid Modulation of Spontaneous Inhibitory Postsynaptic Currents in Cultured Hippocampal Neurons and Steady-State Single-Channel Currents from Heterologously Expressed alpha1beta2gamma2L GABA(A) Receptors. *Mol Pharmacol* **89**, 399-406
66. Jones, M. V., and Westbrook, G. L. (1996) The impact of receptor desensitization on fast synaptic transmission. *Trends Neurosci* **19**, 96-101
67. Miller, P. S., and Aricescu, A. R. (2014) Crystal structure of a human GABA<sub>A</sub> receptor. *Nature* **512**, 270-275
68. Jansen, M., Bali, M., and Akabas, M. H. (2008) Modular design of Cys-loop ligand-gated ion channels: functional 5-HT<sub>3</sub> and GABA rho1 receptors lacking the large cytoplasmic M3M4 loop. *J Gen Physiol* **131**, 137-146
69. Edgar, R. C. (2004) MUSCLE: a multiple sequence alignment method with reduced time and space complexity. *BMC Bioinformatics* **5**, 113
70. Sali, A., and Blundell, T. L. (1993) Comparative protein modelling by satisfaction of spatial restraints. *J Mol Biol* **234**, 779-815
71. Shen, M. Y., and Sali, A. (2006) Statistical potential for assessment and prediction of protein structures. *Protein Sci* **15**, 2507-2524
72. Lee, J., Cheng, X., Swails, J. M., Yeom, M. S., Eastman, P. K., Lemkul, J. A., Wei, S., Buckner, J., Jeong, J. C., Qi, Y., Jo, S., Pande, V. S., Case, D. A., Brooks, C. L., 3rd, MacKerell, A. D., Jr., Klauda, J. B., and Im, W. (2016) CHARMM-GUI Input Generator for NAMD, GROMACS, AMBER, OpenMM, and CHARMM/OpenMM Simulations Using the CHARMM36 Additive Force Field. *J Chem Theory Comput* **12**, 405-413
73. McGibbon, R. T., Beauchamp, K. A., Harrigan, M. P., Klein, C., Swails, J. M., Hernandez, C. X., Schwantes, C. R., Wang, L. P., Lane, T. J., and Pande, V. S. (2015) MDTraj: A Modern Open Library for the Analysis of Molecular Dynamics Trajectories. *Biophys J* **109**, 1528-1532

74. Trott, O., and Olson, A. J. (2010) AutoDock Vina: improving the speed and accuracy of docking with a new scoring function, efficient optimization, and multithreading. *J Comput Chem* **31**, 455-461
75. O'Boyle, N. M., Banck, M., James, C. A., Morley, C., Vandermeersch, T., and Hutchison, G. R. (2011) Open Babel: An open chemical toolbox. *J Cheminform* **3**, 33
76. Meslamani, J. E., Andre, F., and Petitjean, M. (2009) Assessing the Geometric Diversity of Cytochrome P450 Ligand Conformers by Hierarchical Clustering with a Stop Criterion. *J Chem Inf Model* **49**, 330-337



## **SUPPLEMENTAL MATERIALS**

### **Site-specific effects of neurosteroids on GABA<sub>A</sub> receptor activation and desensitization**

**Yusuke Sugasawa, Wayland W. L. Cheng, John R. Bracamontes, Zi-Wei Chen, Lei Wang,  
Allison L. Germann, Spencer R. Pierce, Thomas C. Senneff, Kathiresan Krishnan,  
David E. Reichert, Douglas F. Covey, Gustav Akk, Alex S. Evers**

FIGURE 1–FIGURE SUPPLEMENT 1

FIGURE 4–FIGURE SUPPLEMENTS 1-2

FIGURE 6–FIGURE SUPPLEMENTS 1-2

SUPPLEMENTARY FILES 1-3

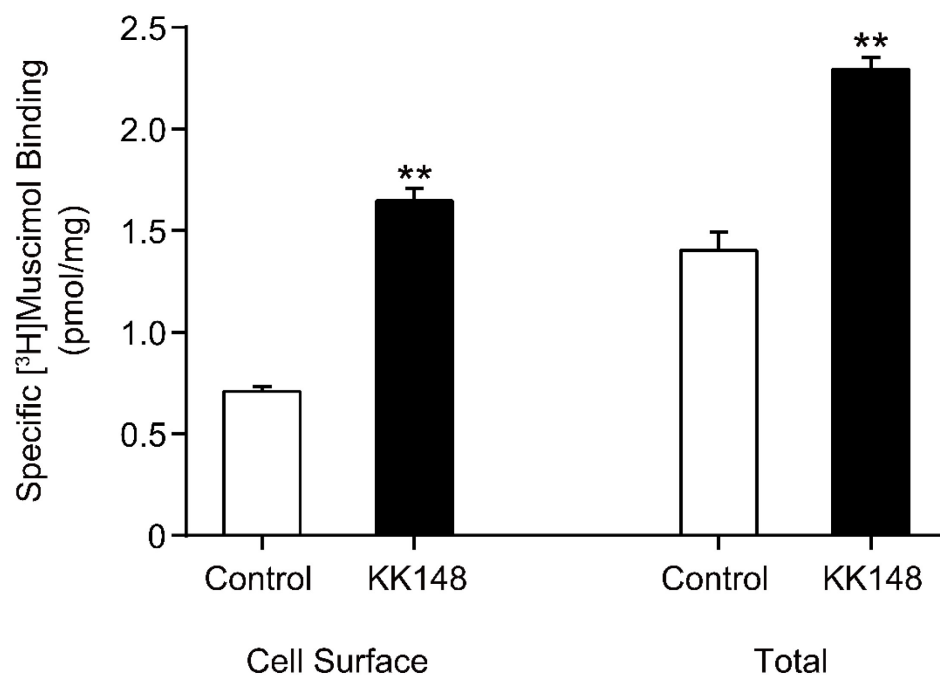

FIGURE 1–FIGURE SUPPLEMENT 1: **Neurosteroid modulation of muscimol binding to intact cells.** Enhancement of specific [<sup>3</sup>H]muscimol (3 nM) binding to α<sub>1</sub>β<sub>3</sub> GABA<sub>A</sub>Rs on intact HEK cell surfaces (left bars) and total receptors (cell surface receptors + intracellular receptors, right bars) by 10 μM KK148 (*n* = 6, ± SEM). The larger amount of control binding in total vs. cell surface demonstrates the distribution of GABA<sub>A</sub>R between plasma membrane and intracellular membrane. \*\**P* < 0.01 vs. control.

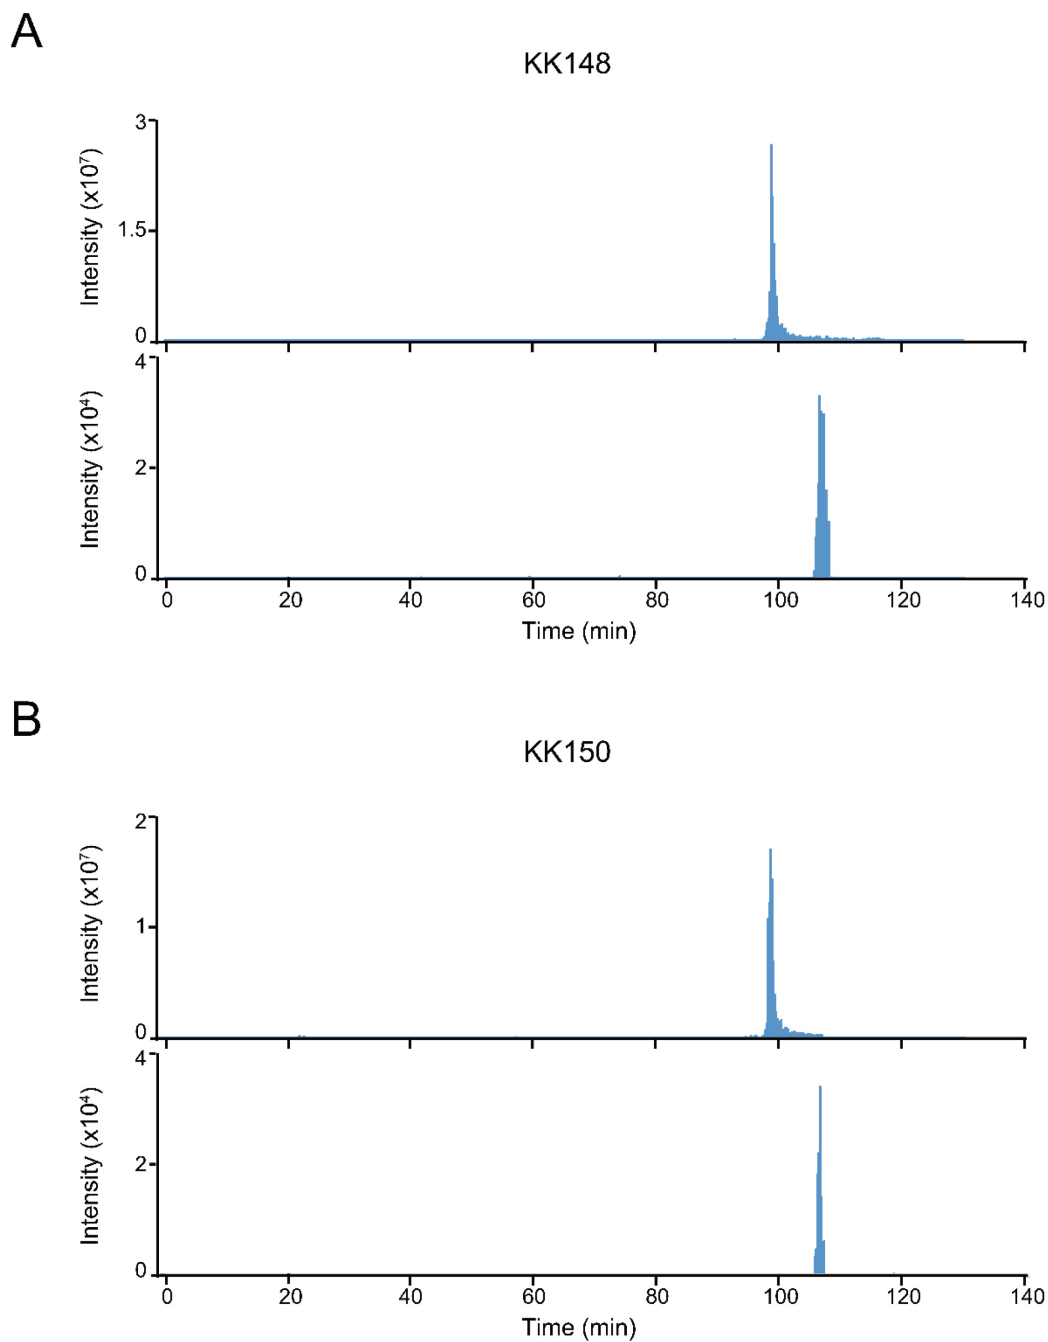

**FIGURE 4—FIGURE SUPPLEMENT 1: Extracted ion chromatograms of labeled and unlabeled  $\beta_3$  subunit TM4 peptides.** (A) Extracted ion chromatogram (XIC) of the  $\beta_3$  subunit TM4 tryptic peptide in the  $\alpha_1\beta_3$  GABA<sub>A</sub>R. The upper and lower XIC show representative unlabeled  $\beta_3$  subunit TM4 peptide and the peptide labeled with 30  $\mu$ M KK148, respectively. (B) Same as (A) for KK150.

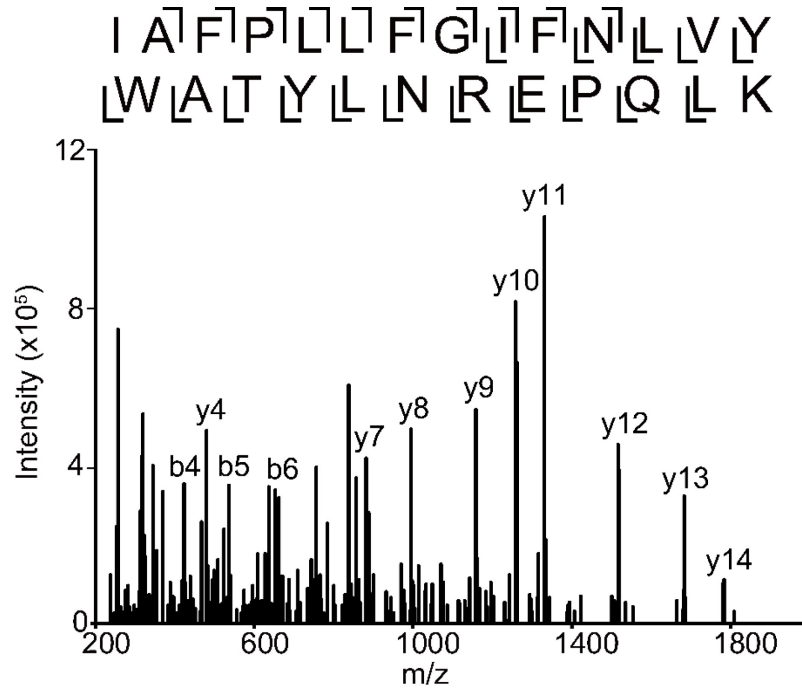

FIGURE 4—FIGURE SUPPLEMENT 2: **Fragmentation spectrum of unlabeled  $\alpha_1$  subunit TM4 peptide.** HCD fragmentation spectrum of the  $\alpha_1$  subunit TM4 unlabeled tryptic peptide in the  $\alpha_1\beta_3$  GABA<sub>A</sub>R.

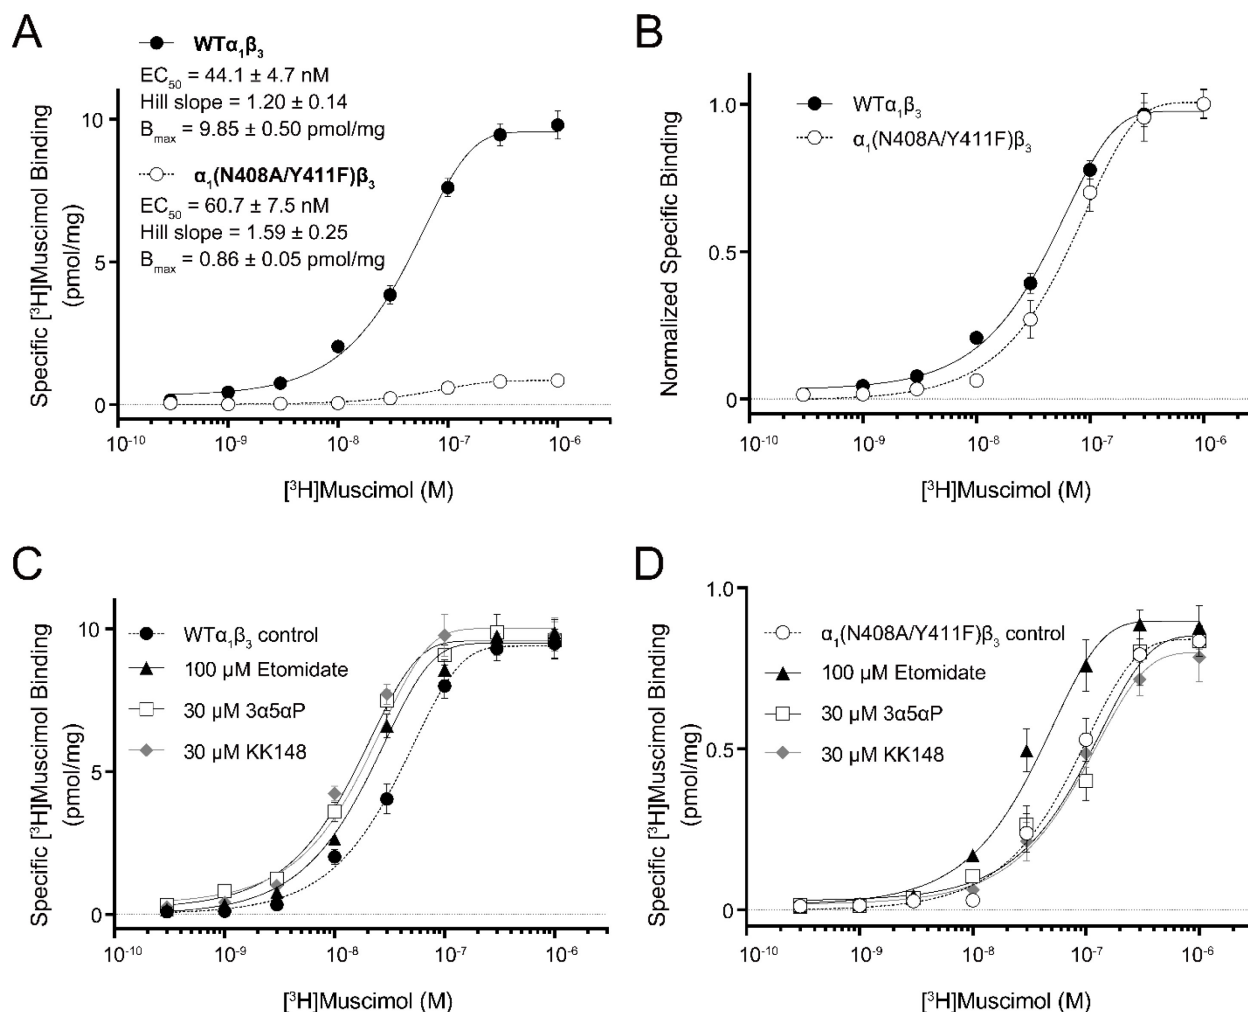

FIGURE 6—FIGURE SUPPLEMENT 1: Neurosteroid effect on [ $^3$ H]muscimol binding isotherms in  $\alpha_1\beta_3$  WT and  $\alpha_1(N408A/Y411F)\beta_3$  GABA<sub>A</sub>Rs. (A) [ $^3$ H]muscimol binding isotherms (0.3 nM–1  $\mu$ M) for  $\alpha_1\beta_3$  GABA<sub>A</sub>R WT and  $\alpha_1(N408A/Y411F)\beta_3$  GABA<sub>A</sub>R. The  $EC_{50}$ , Hill slope and  $B_{max}$  are presented as mean  $\pm$  SEM ( $n = 3$ ). (B) Normalized curves of specific [ $^3$ H]muscimol binding shown in (A). (C) Effect of 100  $\mu$ M etomidate, 30  $\mu$ M allopregnanolone (3 $\alpha$ 5 $\alpha$ P) and 30  $\mu$ M KK148 on [ $^3$ H]muscimol binding isotherms in the  $\alpha_1\beta_3$  GABA<sub>A</sub>R WT. (D) Same as (C) in the  $\alpha_1(N408A/Y411F)\beta_3$  mutant. Each data point represents mean  $\pm$  SEM from triplicate experiments.

| <b>WT<math>\alpha_1\beta_3</math></b>                         | <b>EC<sub>50</sub> (nM)</b>                        | <b>Hill slope</b> |
|---------------------------------------------------------------|----------------------------------------------------|-------------------|
| Control                                                       | 35.5 ± 4.2                                         | 1.32 ± 0.18       |
| Etomidate (100 μM)                                            | 19.9 ± 1.6 (* <i>P</i> = 0.026 vs. control)        | 1.43 ± 0.15       |
| 3 $\alpha$ 5 $\alpha$ P (30 μM)                               | 15.1 ± 1.6 (* <i>P</i> = 0.011 vs. control)        | 1.57 ± 0.24       |
| KK148 (30 μM)                                                 | 12.6 ± 1.3 (* <i>P</i> < 0.01 vs. control)         | 1.60 ± 0.24       |
| <b><math>\alpha_1</math>(N408A/Y411F)<math>\beta_3</math></b> |                                                    |                   |
| Control                                                       | 68.2 ± 12.3                                        | 1.41 ± 0.30       |
| Etomidate                                                     | 27.0 ± 3.9 (* <i>P</i> = 0.033 vs. control)        | 1.45 ± 0.28       |
| 3 $\alpha$ 5 $\alpha$ P                                       | 98.4 ± 29.6 ( <i>P</i> = 0.399 vs. control)        | 1.05 ± 0.28       |
| KK148                                                         | 72.8 ± 12.8 ( <i>P</i> = 0.808 vs. control)        | 1.30 ± 0.25       |
| <b>WT<math>\alpha_1\beta_3</math></b>                         | <b>Statistical difference between the curves</b>   |                   |
| Control vs. Etomidate                                         | <i>F</i> <sub>7,32</sub> = 3.27, * <i>P</i> < 0.01 |                   |
| Control vs. 3 $\alpha$ 5 $\alpha$ P                           | <i>F</i> <sub>7,32</sub> = 4.27, * <i>P</i> < 0.01 |                   |
| Control vs. KK148                                             | <i>F</i> <sub>7,32</sub> = 5.96, * <i>P</i> < 0.01 |                   |
| <b><math>\alpha_1</math>(N408A/Y411F)<math>\beta_3</math></b> |                                                    |                   |
| Control vs. Etomidate                                         | <i>F</i> <sub>7,32</sub> = 2.21, <i>P</i> = 0.060  |                   |
| Control vs. 3 $\alpha$ 5 $\alpha$ P                           | <i>F</i> <sub>7,32</sub> = 0.71, <i>P</i> = 0.662  |                   |
| Control vs. KK148                                             | <i>F</i> <sub>7,32</sub> = 0.29, <i>P</i> = 0.952  |                   |

FIGURE 6–FIGURE SUPPLEMENT 2: **Properties of [<sup>3</sup>H]muscimol saturation binding curves in the  $\alpha_1\beta_3$  GABA<sub>A</sub>R WT and  $\alpha_1$ (N408A/Y411F) $\beta_3$  mutant.** EC<sub>50</sub> and Hill slope for the [<sup>3</sup>H]muscimol saturation binding curves in Figure 6–figure supplement 1C-D. EC<sub>50</sub> values were compared by unpaired *t*-test. Statistical differences between the whole curves are analyzed using two-way ANOVA. Data are presented as mean ± SEM (*n* = 3).

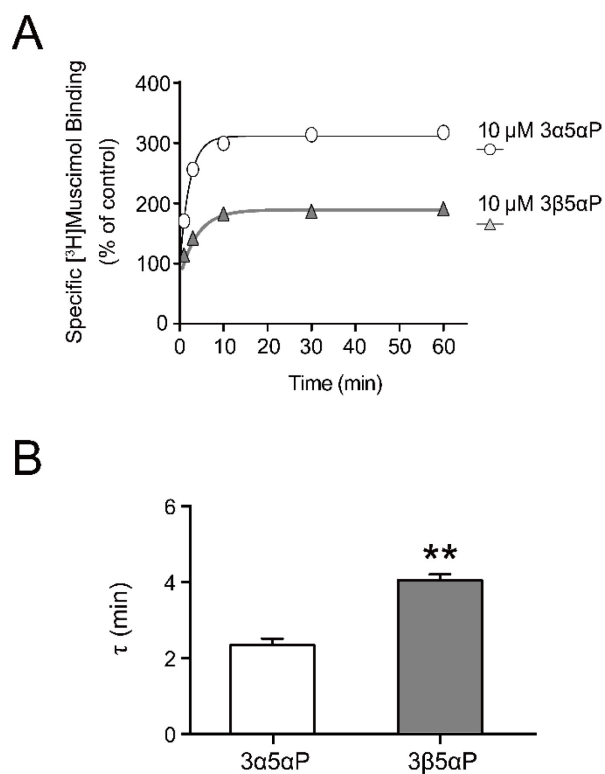

**SUPPLEMENTARY FILE 1: Time course of neurosteroid modulation of muscimol binding.** (A) Time course of [<sup>3</sup>H]muscimol binding enhancement by 10 μM allopregnanolone (3α5αP) and epi-allopregnanolone (3β5αP). Neurosteroids were added to  $\alpha_1\beta_3$  GABA<sub>A</sub>R membranes that had been fully equilibrated with 3 nM [<sup>3</sup>H]muscimol and binding was measured as a function of time ( $n = 4, \pm$  SEM). (B) Time constants for neurosteroid-induced enhancement of [<sup>3</sup>H]muscimol binding ( $n = 4, \pm$  SEM). \*\* $P < 0.01$  vs. 3α5αP.

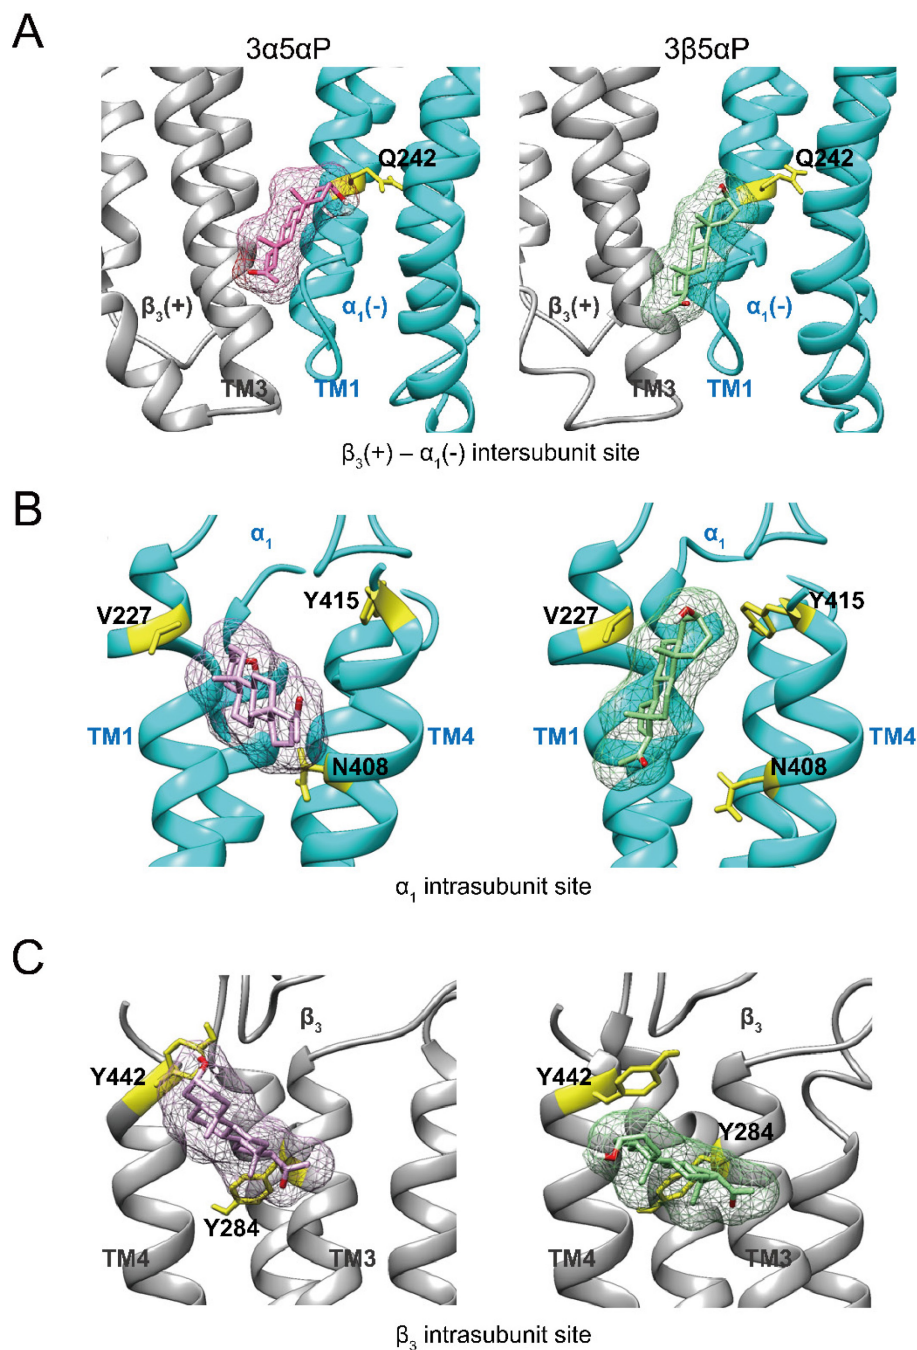

SUPPLEMENTARY FILE 2: **Allopregnanolone and epi-allopregnanolone docking poses within three neurosteroid binding pockets in the  $\alpha_1\beta_3$  GABA $_A$ R TMD.** (A) Representative poses for allopregnanolone (3 $\alpha$ 5 $\alpha$ P) (pink) and epi-allopregnanolone (3 $\beta$ 5 $\alpha$ P) (light green) docked within the  $\beta_3(+)$ – $\alpha_1(-)$  intersubunit site (Vina score: -7.2 for 3 $\alpha$ 5 $\alpha$ P; -5.9 for 3 $\beta$ 5 $\alpha$ P). The receptor snapshot is shown along with the  $\alpha_1$ Q242 side chain (yellow). (B) Same as (A) for the  $\alpha_1$  intrasubunit site (Vina score: -5.6 for 3 $\alpha$ 5 $\alpha$ P; -5.8 for 3 $\beta$ 5 $\alpha$ P). The receptor snapshot is shown along with the  $\alpha_1$ V227,  $\alpha_1$ Y415 and  $\alpha_1$ N408 side chains. (C) Same as (A) for the  $\beta_3$  intrasubunit site (Vina score: -4.0 for 3 $\alpha$ 5 $\alpha$ P; -3.6 for 3 $\beta$ 5 $\alpha$ P). The receptor snapshot is shown along with the  $\beta_3$ Y284 and  $\beta_3$ Y442 side chains.



|                               | Potentiation response ratio           |                        | Reduction of potentiation in the presence of competitor (%) | # Cells |
|-------------------------------|---------------------------------------|------------------------|-------------------------------------------------------------|---------|
|                               | 0.1 $\mu$ M $3\alpha 5\alpha$ P alone | + 1 $\mu$ M competitor |                                                             |         |
| $3\alpha 5\alpha$ P vs. KK148 | 5.1 $\pm$ 2.0                         | 4.0 $\pm$ 1.2          | 24 $\pm$ 16                                                 | 6       |
| $3\alpha 5\alpha$ P vs. KK150 | 6.4 $\pm$ 2.1                         | 5.8 $\pm$ 1.9          | 12 $\pm$ 3                                                  | 5       |

SUPPLEMENTARY FILE 3: **KK148 and KK150 decrease allopregnanolone-induced potentiation.** Neurosteroid potentiation of  $\alpha_1\beta_3$  GABA<sub>A</sub>Rs in *Xenopus laevis* oocytes is expressed as potentiation response ratio, calculated as the ratio of the peak responses in the presence of GABA and 0.1  $\mu$ M allopregnanolone ( $3\alpha 5\alpha$ P) to the peak response in the presence of GABA alone. The GABA concentrations were selected to generate a response of 3–9% of the response to saturating GABA (30  $\mu$ M). Co-application of KK148 or KK150 reduces the potentiating effect of  $3\alpha 5\alpha$ P on GABA-elicited currents. Data are shown as mean  $\pm$  SD.
